# Supplementary material for: Pd(ii)-catalyzed alkylation of unactivated C(sp3)–H bonds: efficient synthesis of optically active unnatural α-amino acids
Source: Royal Society of Chemistry journal article supplement (doi:10.1039/c3sc51747k), 2013-01-01
Supplement: c3sc51747k.pdf [file c3sc51747k.pdf]

## Supporting Information I

### **Pd(II)-Catalyzed Alkylation of Unactivated C(sp<sup>3</sup>)-H Bonds : Efficient Synthesis of Optically Active Unnatural $\alpha$ -Amino Acids**

Kai Chen,<sup>a</sup> Fang Hu,<sup>b</sup> Shuo-Qing Zhang,<sup>a</sup> Bing-Feng Shi<sup>\*a,b</sup>

<sup>a</sup>Department of Chemistry, Zhejiang University, Hangzhou 310027, China

<sup>b</sup>State Key Laboratory of Bioorganic and Natural Products Chemistry, Shanghai Institute of Organic Chemistry, Chinese Academy of Sciences, Shanghai 200032, China

\*To whom correspondence should be addressed. Email: bfshi@zju.edu.cn

|                                                                           |                |
|---------------------------------------------------------------------------|----------------|
| <b>Table of Contents</b>                                                  | <b>S1</b>      |
| <b>General Information</b>                                                | <b>S2</b>      |
| <b>Experimental Procedures</b>                                            | <b>S3-S39</b>  |
| General Procedure for Preparation of 8-Aminoquinoline Amides              | <b>S3-S10</b>  |
| Optimization of Reaction Conditions                                       | <b>S11-S13</b> |
| General Procedure for Alkylation of Primary C(sp <sup>3</sup> )-H Bonds   | <b>S14-S29</b> |
| General Procedure for Alkylation of Secondary C(sp <sup>3</sup> )-H Bonds | <b>S30-S36</b> |
| General Procedure for Arylation of Secondary C(sp <sup>3</sup> )-H Bonds  | <b>S37-S39</b> |
| Cleavage of the 8-Aminoquinoline Group                                    | <b>S40-S42</b> |
| Synthesis of Palladacycle Compound                                        | <b>S43-S44</b> |
| <b>References</b>                                                         | <b>S45</b>     |

**General Information:** Unless otherwise noted all commercial materials were used without further purification. Solvents were used after purification directed by *Purification of Laboratory Chemicals, 6th Ed.* Nuclear magnetic resonance (NMR) spectra were recorded with Bruker AVANCE 400MHz.  $^1\text{H}$  and  $^{13}\text{C}$  chemical shifts are reported in ppm downfield of tetramethylsilane and referenced to residual solvent peak as following:  $\text{CHCl}_3 = 7.26$  ( $^1\text{H}$  NMR),  $\text{DMSO} = 2.50$  ( $^1\text{H}$  NMR),  $\text{CDCl}_3 = 77.16$  ( $^{13}\text{C}$  NMR),  $\text{DMSO} = 39.52$  ( $^{13}\text{C}$  NMR). Multiplicities are reported using the following abbreviations: s = singlet, d = doublet, t = triplet, q = quartet, m = multiplet, br = broad resonance. High resolution mass spectra for new compounds were recorded at Mass Spectrometry Facilities, Zhejiang University. X-ray diffractions were recorded at X-Ray Facilities, Zhejiang University.

## Experimental Procedures:

### General Procedure(GP-1) for Preparation of *N*-Phthaloyl-Amino Acid 8-Aminoquinoline Amides

To a stirred solution of the acid chloride (24 mmol) in dichloromethane (50 mL), 8-aminoquinoline (2.883 g, 20 mmol) was added slowly at 0 °C. After the solution was stirred for five minutes, triethylamine (3.97 mL, 24 mmol) was added dropwise slowly at 0 °C. The resulting mixture was stirred at room temperature for 5 h and then the reaction was diluted with dichloromethane (50 mL), washed by aqueous HCl (50 mL, 1 M), saturated NaHCO<sub>3</sub> (50 mL), brine (50 mL), and dried over anhydrous MgSO<sub>4</sub>. Evaporation of organic solvent and purification by column chromatography or recrystallization afforded pure 8-aminoquinoline amide.<sup>1</sup>

### (*S*)-2-(1,3-Dioxisoindolin-2-yl)-*N*-(quinolin-8-yl)propanamide(**1a**)

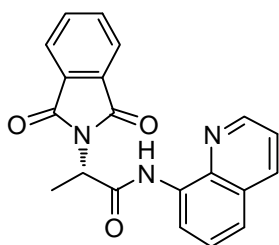

*L*-Alanine (8.91 g, 0.10 mol) and Na<sub>2</sub>CO<sub>3</sub> (10.60 g, 0.10 mol) were dissolved in water (100 mL) at room temperature and *N*-ethoxycarbonylphthalimide (21.91 g, 0.10 mol) was added to the solution in small portions. The reaction was stirred for 45 minutes, then the aqueous solution was slowly acidified with aqueous HCl (6 M) until pH = 1 at 0 °C and white precipitate appeared slowly. Collecting and washing the precipitate with aqueous HCl (20 mL, 1M) and ethyl ether: petroleum ether = 1:5 (20 mL) gave (*S*)-2-phthalimidopropionic acid (19.10 g, 87%).

(*S*)-2-Phthalimidopropionic acid (5.26 g, 24 mmol), thionyl chloride (8.70 mL, 120 mmol), and 3 drops of dimethylformamide were heated in dichloromethane (50 mL) at 55 °C for 5 h. After the reaction, dichloromethane and excess of thionyl chloride were removed by vacuum. The acid chloride was dissolved in dichloromethane (50 mL) and used for next reaction.

The compound **1a** was prepared according to **GP-1**. The mixture was dissolved in ethyl acetate (5 mL), then petroleum ether (20 mL) was added slowly, and white solid appeared slowly. Collecting and washing the precipitate with ethyl ether: petroleum ether = 1:5 (10 mL) gave **1a** (5.36 g). Evaporation of the filtrate collected after filtration, followed by column chromatography in petroleum ether: ethyl acetate = 2:1 gave **1a** (0.64 g). The combined **1a** was obtained (6.00 g, 87%) as a white solid. This is a known compound.<sup>2</sup> <sup>1</sup>H NMR (400 MHz, CDCl<sub>3</sub>) δ 10.31 (s, 1H), 8.71 (dd, *J* = 5.4, 3.6 Hz, 1H), 8.67 (dd, *J* = 4.2, 1.6 Hz, 1H), 8.13 (dd, *J* = 8.3, 1.6 Hz, 1H), 7.89 (dd, *J* = 5.5, 3.0 Hz, 2H), 7.74 (dd, *J* = 5.4, 3.1 Hz, 2H), 7.53 – 7.47 (m, 2H), 7.40 (dd, *J* = 8.3, 4.2 Hz, 1H), 5.26 (q, *J* = 7.3 Hz, 1H), 1.97 (d, *J* = 7.3

Hz, 3H); HPLC Chiralpack<sup>®</sup> AD-Hcolumn (*n*-hexane/isopropanol = 45:55, 0.70 mL/min)  $t_r$  = 17.410 min (major), >99% ee.

### Chiral HPLC Data

#### HPLC Conditions:

Chiral stationary phase: Chiralpack<sup>®</sup> AD-H, *n*-hexane/isopropanol = 45:55, 0.70 mL/min

Signal: VWD1 A, Wavelength = 220 nm

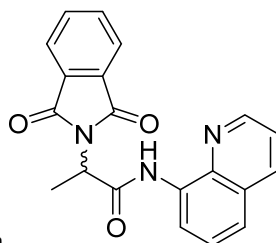

**DL-1a**

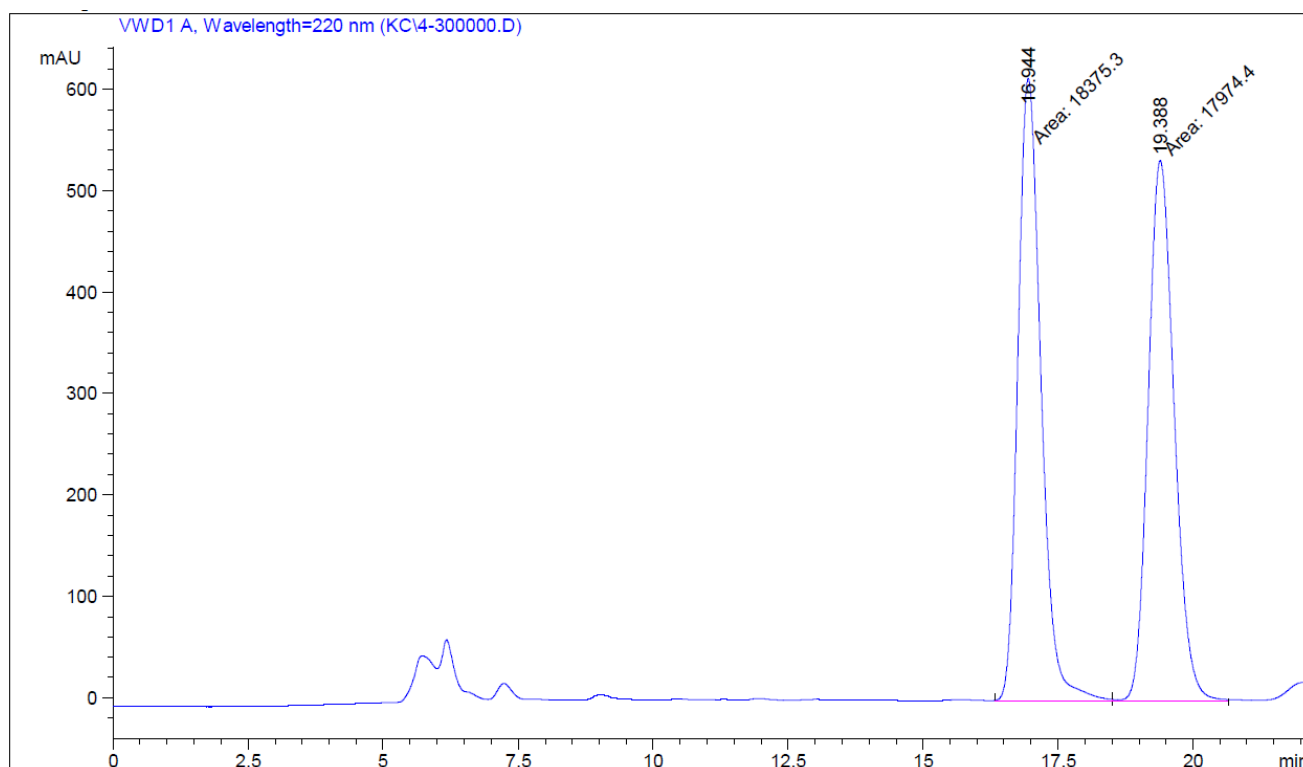

#### Area% report for DL-1a:

| Retention Time (min) | Area (mAU*s) | Area %   | Height (mAU) | Height % |
|----------------------|--------------|----------|--------------|----------|
| 16.944               | 1.83753e4    | 50.5516  | 615.89600    | 53.5397  |
| 19.388               | 1.79744e4    | 49.4484  | 534.45746    | 46.4603  |
| Totals               | 3.63497e4    | 100.0000 | 1150.35345   | 100.0000 |

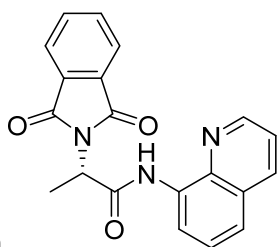

**L-1a**

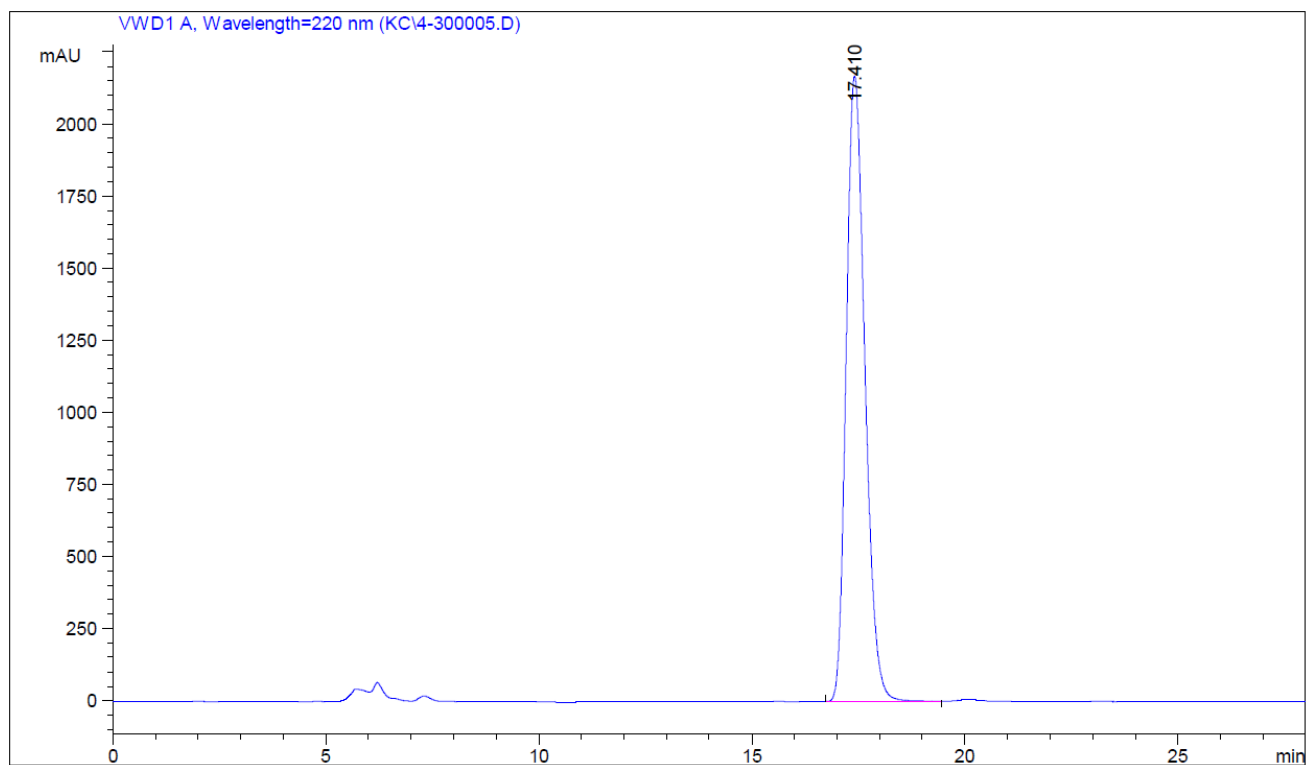

**Area% report for L-1a:**

| Retention Time (min) | Area (mAU*s) | Area %   | Height (mAU) | Height % |
|----------------------|--------------|----------|--------------|----------|
| 17.410               | 6.63528e4    | 100.0000 | 2165.16064   | 100.0000 |
| Totals               | 6.63528e4    | 100.0000 | 2165.16064   | 100.0000 |

**(S)-2-(1,3-Dioxisoindolin-2-yl)-N-(quinolin-8-yl)pentanamide (1b)**

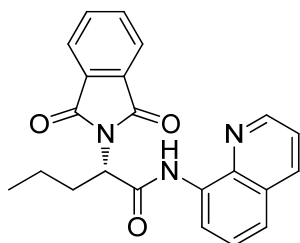

*L*-Norvaline (4.69 g, 40 mmol) and Na<sub>2</sub>CO<sub>3</sub> (4.24 g, 40 mmol) were dissolved in water (100 mL) at room temperature and 8.76 g (40 mmol) of *N*-ethoxycarbonylphthalimide was added to the solution in small portions. The reaction was stirred for 1 hour, and then the aqueous solution was slowly acidified with aqueous HCl (6 M) until pH = 1 at 0 °C. Then the solution was extracted with dichloromethane (3×50 mL), and the organic phase was dried over anhydrous MgSO<sub>4</sub>. Evaporation of organic solvent and purification by column chromatography in ether: ethyl acetate = 1:1 gave (*S*)-2-phthalimidopentanoyl acid (9.48 g, 96%).

(*S*)-2-Phthalimidopentanoyl acid (5.93 g, 24 mmol), thionyl chloride (8.70 mL, 120 mmol), and 3 drops of dimethylformamide were heated in dichloromethane (50 mL) at 55 °C for 8 h. After the reaction, dichloromethane and excess of thionyl chloride were removed by vacuum. The acid chloride was dissolved in dichloromethane (50 mL) and used for next reaction.

The compound **1b** was prepared according to **GP-1**. Purification by column chromatography in petroleum ether: ethyl acetate = 3:1 gave a white solid 6.68g (89%) of **1b**. This compound is known.<sup>2</sup> <sup>1</sup>H NMR (400 MHz, CDCl<sub>3</sub>) δ 10.34 (s, 1H), 8.93 – 8.49 (m, 2H), 8.13 (dd, *J* = 8.2, 1.1 Hz, 1H), 7.90 (dd, *J* = 5.3, 3.1 Hz, 2H), 7.75 (dd, *J* = 5.3, 3.1 Hz, 2H), 7.56 – 7.45 (m, 2H), 7.41 (dd, *J* = 8.2, 4.2 Hz, 1H), 5.15 (dd, *J* = 11.0, 5.2 Hz, 1H), 2.68 – 2.54 (m, 1H), 2.41 – 2.29 (m, 1H), 1.52 – 1.41 (m, 2H), 1.03 (t, *J* = 7.3 Hz, 3H).

**(*S*)-2-(1,3-Dioxoisindolin-2-yl)-3-phenyl-*N*-(quinolin-8-yl)propanamide (1c)**

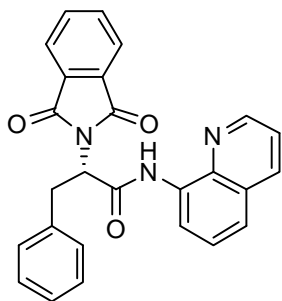

*L*-Phenylalanine (16.52 g, 0.10 mol) and Na<sub>2</sub>CO<sub>3</sub> (10.60 g, 0.10 mol) were dissolved in water (100 mL) at room temperature and *N*-ethoxycarbonylphthalimide (21.91 g, 0.10 mol) was added to the solution in small portions. The reaction was stirred for 2 hours, then the aqueous solution was slowly acidified with aqueous HCl (6 M) until pH = 1 at 0 °C and white precipitate appeared slowly. Collecting and washing the precipitate with ethyl ether: petroleum ether = 1:2 (15 mL) gave (*S*)-3-phenyl-2-phthalimidopropionic acid (25.15 g, 85%).

(*S*)-3-Phenyl-2-phthalimidopropionic acid (7.09 g, 24 mmol), thionyl chloride (8.70 mL, 120 mmol), and 3 drops of dimethylformamide were heated in dichloromethane (50 mL) at 55 °C for 5 h. After the reaction, dichloromethane and excess of thionyl chloride were removed by vacuum. The acid chloride was dissolved in dichloromethane (50 mL) and used for next reaction.

The compound **1c** was prepared according to **GP-1**. The mixture was dissolved in ethyl acetate (5 mL), then petroleum ether (20 mL) was added slowly, and white solid appeared slowly. Collecting and washing the precipitate with ethyl ether: petroleum ether = 1:5 (10 mL) gave **1c** (6.06 g). Evaporation of the filtrate collected after filtration, followed by column chromatography in petroleum ether: ethyl acetate = 5:2 gave 1.10 g of **1c**. The combined **1c** was obtained 7.16 g (85%) of a white solid. This compound is known.<sup>2</sup> <sup>1</sup>H NMR (400 MHz, CDCl<sub>3</sub>) δ 10.33 (s, 1H), 8.74 (dd, *J* = 6.4, 2.5 Hz, 1H), 8.61 (dd, *J* = 4.2, 1.6 Hz, 1H), 8.12 (dd, *J* = 8.3, 1.5 Hz, 1H), 7.82 (dd, *J* = 5.5, 3.1 Hz, 2H), 7.70 (dd, *J* = 5.4, 3.1 Hz, 2H), 7.54 – 7.48 (m, 2H), 7.39 (dd, *J* = 8.3, 4.2 Hz, 1H), 7.29 (d, *J* = 7.3 Hz, 2H), 7.23 (t, *J* = 7.4 Hz, 2H), 7.19 – 7.14 (m, 1H), 5.45 (dd, *J* = 9.7, 6.9 Hz, 1H), 3.86 – 3.76 (m, 2H).

**(S)-2,5-Bis(1,3-dioxisoindolin-2-yl)-N-(quinolin-8-yl)pentanamide (1d)**

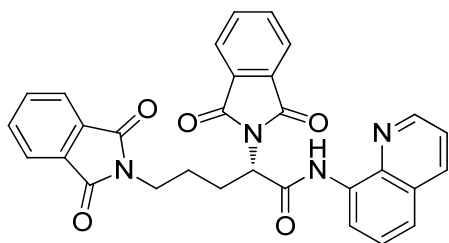

*L*-Ornithine hydrochloride (6.74 g, 40 mmol) and Na<sub>2</sub>CO<sub>3</sub> (6.36 g, 60 mmol) were dissolved in water (100 mL) at room temperature and *N*-ethoxycarbonylphthalimide (17.52 g, 80 mmol) was added to the solution in small portions. The reaction was stirred for 2.5 hours, and then the aqueous solution was slowly acidified with aqueous HCl (6 M) until pH = 1 at 0 °C. Then the solution was extracted with dichloromethane (3×50 mL), and the organic phase was dried over anhydrous MgSO<sub>4</sub>. The organic solvent was removed by evaporation. The mixture was dissolved in ethyl acetate (10 mL), then petroleum ether (30 mL) was added slowly, and white solid appeared slowly. Collecting and washing the precipitate with ethyl ether: petroleum ether = 1:5 (10 mL) gave (*S*)-2,5-diphthalimidopentanic acid (12.26 g, 78%).

(*S*)-2,5-Diphthalimidopentanic acid (9.41 g, 24 mmol), thionyl chloride (8.70 mL, 120 mmol), and 3 drops of dimethylformamide were heated in dichloromethane (50 mL) at 55 °C for 8 h. After the reaction, dichloromethane and excess of thionyl chloride were removed by vacuum. The acid chloride was dissolved in dichloromethane (50 mL) and used for next reaction.

The compound **1d** was prepared according to **GP-1**. The mixture was dissolved ethyl acetate (5 mL), then petroleum ether (20 mL) added slowly, and white solid appeared slowly. Collecting and washing the precipitate with ethyl ether: petroleum ether = 1:5 (10 mL) gave **1d** (6.85 g). Evaporation of the filtrate collected after filtration, followed by column chromatography in petroleum ether: ethyl acetate = 3:2 gave 2.53 g of **1d**. The combined **1d** was obtained 9.38 g (85%) of a white solid. <sup>1</sup>H NMR (400 MHz, CDCl<sub>3</sub>) δ 10.28 (s, 1H), 8.72 – 8.63 (m, 1H), 8.59 (dd, *J* = 4.1, 1.4 Hz, 1H), 8.10 (dd, *J* = 8.2, 1.2 Hz, 1H), 7.88 (dd, *J* = 5.4, 3.0 Hz, 2H), 7.80 (dd, *J* = 5.4, 3.1 Hz, 2H), 7.74 (dd, *J* = 5.4, 3.1 Hz, 2H),

7.68 (dd,  $J = 5.4, 3.0$  Hz, 2H), 7.50 – 7.44 (m, 2H), 7.38 (dd,  $J = 8.3, 4.2$  Hz, 1H), 5.26 (dd,  $J = 11.1, 5.0$  Hz, 1H), 3.88 – 3.75 (m, 2H), 2.72 – 2.61 (m, 1H), 2.51 – 2.40 (m, 1H), 1.89 – 1.78 (m, 2H);  $^{13}\text{C}$  NMR (101 MHz,  $\text{CDCl}_3$ )  $\delta$  168.44, 168.12, 166.61, 148.39, 138.58, 136.33, 134.38, 134.03, 133.94, 132.18, 131.88, 127.91, 127.35, 123.77, 123.35, 122.02, 121.70, 116.81, 54.55, 37.12, 26.08, 25.85. HRMS (EI)  $m/z$ : 518.1590 ( $\text{M}^+$ ); calc. for  $\text{C}_{30}\text{H}_{22}\text{N}_4\text{O}_5$ : 518.1590.

**(S)-2,6-Bis(1,3-dioxisoindolin-2-yl)-N-(quinolin-8-yl)hexanamide (1e)**

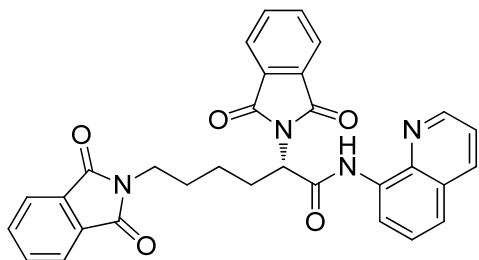

*L*-Lysine (5.85 g, 40 mmol) and  $\text{Na}_2\text{CO}_3$  (4.24g, 40 mmol) were dissolved in water (100 mL) at room temperature and *N*-ethoxycarbonylphthalimide (17.52 g, 80 mmol) was added to the solution in small portions. The reaction was stirred for 3 hours, and then the aqueous solution was slowly aqueous acidified with HCl (6 M) until pH = 1 at 0 °C. Then the solution was extracted with dichloromethane (3×50 mL), and the organic phase was dried over anhydrous  $\text{MgSO}_4$ . Evaporation of organic solvent and purification by column chromatography in petroleum ether: ethyl acetate = 2:3 gave 12.04 g (74%) of (S)-2,6-diphthalimido-hexanoic acid.

(S)-2,6-Diphthalimidohexanoic acid (9.75 g, 24 mmol), thionyl chloride (8.70 mL, 120 mmol), and 3 drops of dimethylformamide were heated in dichloromethane (50 mL) at 55 °C for 8 h. After the reaction, dichloromethane and excess of thionyl chloride were removed by vacuum. The acid chloride was dissolved in dichloromethane (50 mL) and used for next reaction.

The compound **1e** was prepared according to **GP-1**. Purification by column chromatography in petroleum ether: ethyl acetate = 3:2 gave 8.11 g (76%) of **1e**. This compound is known.<sup>1</sup>  $^1\text{H}$  NMR (400 MHz,  $\text{CDCl}_3$ )  $\delta$  10.30 (s, 1H), 8.75 – 8.43 (m, 2H), 8.11 (d,  $J = 8.3$  Hz, 1H), 7.87 (dd,  $J = 5.3, 3.1$  Hz, 2H), 7.78 (dd,  $J = 5.3, 3.1$  Hz, 2H), 7.74 (dd,  $J = 5.3, 3.1$  Hz, 2H), 7.67 (dd,  $J = 5.3, 3.1$  Hz, 2H), 7.52 – 7.43 (m, 2H), 7.39 (dd,  $J = 7.7, 4.1$  Hz, 1H), 5.10 (dd,  $J = 10.7, 5.0$  Hz, 1H), 3.69 (t,  $J = 7.1$  Hz, 2H), 2.69 – 2.54 (m, 1H), 2.52 – 2.39 (m, 1H), 1.93 – 1.82 (m, 1H), 1.80 – 1.72 (m, 1H), 1.58 – 1.41 (m, 2H).

**(S)-2-(1,3-Dioxisoindolin-2-yl)-4-methyl-N-(quinolin-8-yl)pentanamide (1f)**

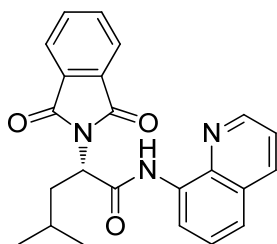



*L*-Leucine (5.25 g, 40 mmol) and Na<sub>2</sub>CO<sub>3</sub> (4.24 g, 40 mmol) were dissolved in water (100 mL) at room temperature and *N*-ethoxycarbonylphthalimide (8.76 g, 40 mmol) was added to the solution in small portions. The reaction was stirred for 4 hour, and then the aqueous solution was slowly acidified with aqueous HCl (6 M) until pH = 1 at 0 °C. The solution was then extracted with dichloromethane (3×50 mL), and the organic phase was dried over anhydrous MgSO<sub>4</sub>. Evaporation of organic solvent and purification by column chromatography in ether: ethyl acetate = 1:1 gave (*S*)-2-phthalimido-4-methyl-pentanoic acid (8.57 g, 82%).

(*S*)-2-Phthalimido-4-methyl-pentanoic acid (6.27 g, 24 mmol), thionyl chloride (8.70 mL, 120 mmol), and 3 drops of dimethylformamide were heated in dichloromethane (50 mL) at 55 °C for 8 h. After the reaction, dichloromethane and excess of thionyl chloride were removed by vacuum. The acid chloride was dissolved in dichloromethane (50 mL) and used for next reaction.

The compound **1f** was prepared according to GP-1. Purification by column chromatography in petroleum ether: ethyl acetate = 3:1 gave a white solid 6.82g (88%) of **1f**. This compound is known.<sup>2</sup> <sup>1</sup>H NMR (400 MHz, CDCl<sub>3</sub>) δ 10.31 (s, 1H), 8.69 (dd, *J* = 5.3, 3.6 Hz, 1H), 8.66 (dd, *J* = 4.2, 1.7 Hz, 1H), 8.08 (dd, *J* = 8.3, 1.6 Hz, 1H), 7.87 (dd, *J* = 5.4, 3.0 Hz, 2H), 7.72 (dd, *J* = 5.4, 3.0 Hz, 2H), 7.49 – 7.42 (m, 2H), 7.37 (dd, *J* = 8.3, 4.2 Hz, 1H), 5.23 (dd, *J* = 11.3, 4.9 Hz, 1H), 2.70 – 2.60 (m, 1H), 2.16 – 2.07 (m, 1H), 1.68 – 1.58 (m, 1H), 1.03 (dd, *J* = 10.6, 6.6 Hz, 6H).

**(*S*)-3-Cyclohexyl-2-(1,3-dioxoisindolin-2-yl)-*N*-(quinolin-8-yl)propanamide (1g)**

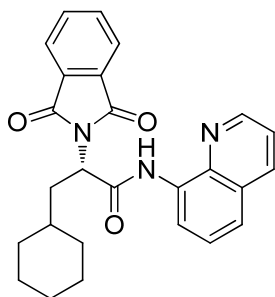

*L*-Cyclohexylalanine (6.85 g, 40 mmol) and Na<sub>2</sub>CO<sub>3</sub> (4.24 g, 40 mmol) were dissolved in water (100 mL) at room temperature and *N*-ethoxycarbonylphthalimide (8.76 g, 40 mmol) was added to the solution in small portions. The reaction was stirred for 2 hours, and then the aqueous solution was slowly acidified with aqueous HCl (6 M) until pH = 1 at 0 °C. Then the solution was extracted with dichloromethane (3×50 mL), and the organic phase was dried over anhydrous MgSO<sub>4</sub>. Evaporation of organic solvent and purification by column chromatography in ether: ethyl acetate = 1:1 gave (*S*)-3-cyclohexyl-2-phthalimidopropionic acid (10.30 g, 85%).

(*S*)-3-Cyclohexyl-2-phthalimidopropionic acid (7.23 g, 24 mmol), thionyl chloride (8.70 mL, 120 mmol), and 3 drops of dimethylformamide were heated in dichloromethane (50 mL) at 55 °C for 8 h. After the reaction, dichloromethane and excess of thionyl chloride were removed by vacuum. The acid chloride was dissolved in dichloromethane (50 mL) and used for next reaction.

The compound **1g** was prepared according to GP-1. The mixture was dissolved ethyl acetate (5 mL), then petroleum ether (20 mL) was added slowly, and white solid appeared slowly. Collecting and washing the precipitate with ethyl ether: petroleum ether = 1:5 (10 mL) gave **1g** (5.44 g). Evaporation of the filtrate collected after filtration, followed by column chromatography in petroleum ether: ethyl acetate = 5:2 gave 1.83 g of **1g**. The combined **1g** was obtained 7.27 g (85%) of a white solid. <sup>1</sup>H NMR (400 MHz, CDCl<sub>3</sub>) δ 10.31 (s, 1H), 8.77 – 8.59 (m, 2H), 8.10 (dd, *J* = 8.3, 1.5 Hz, 1H), 7.88 (dd, *J* = 5.4, 3.1 Hz, 2H), 7.73 (dd, *J* = 5.4, 3.1 Hz, 2H), 7.51 – 7.43 (m, 2H), 7.39 (dd, *J* = 8.3, 4.2 Hz, 1H), 5.25 (dd, *J* = 11.0, 5.1 Hz, 1H), 2.57 (ddd, *J* = 15.2, 11.1, 4.4 Hz, 1H), 2.20 (ddd, *J* = 14.2, 9.3, 5.2 Hz, 1H), 1.98 (d, *J* = 12.4 Hz, 1H), 1.80 – 1.66 (m, 3H), 1.63 (s, 1H), 1.37 – 1.28 (m, 1H), 1.23 – 0.98 (m, 5H); <sup>13</sup>C NMR (101 MHz, CDCl<sub>3</sub>) δ 168.29, 167.57, 148.45, 138.62, 136.38, 134.31, 134.08, 132.02, 127.96, 127.40, 123.72, 121.97, 121.73, 116.77, 53.06, 36.31, 34.99, 33.83, 32.18, 26.52, 26.29, 26.10. HRMS (EI) *m/z*: 427.1893 (M<sup>+</sup>); calc. for C<sub>26</sub>H<sub>25</sub>N<sub>3</sub>O<sub>3</sub>: 427.1896.

**(S)-2-(1,3-Dioxisoindolin-2-yl)-3-methyl-N-(quinolin-8-yl)butanamide (1h)**

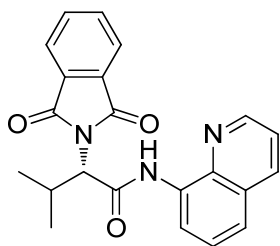

*L*-Valine (4.69 g, 40 mmol) and Na<sub>2</sub>CO<sub>3</sub> (4.24 g, 40 mmol) were dissolved in water (100 mL) at room temperature and 8.76 g (40 mmol) of *N*-ethoxycarbonylphthalimide was added to the solution in small portions. The reaction was stirred for 5 hour, and then the aqueous solution was slowly acidified with aqueous HCl (6 M) until pH = 1 at 0 °C. Then the solution was extracted with dichloromethane (3×50 mL), and the organic phase was dried over anhydrous MgSO<sub>4</sub>. Evaporation of organic solvent and purification by column chromatography in ether: ethyl acetate = 1:1 gave (*S*)-2-phthalimido-3-methyl-butyric acid (8.88 g, 90%).

(*S*)-2-Phthalimidopentanoyl acid (5.93 g, 24 mmol), thionyl chloride (8.70 mL, 120 mmol), and 3 drops of dimethylformamide were heated in dichloromethane (50 mL) at 55 °C for 8 h. After the reaction, dichloromethane and excess of thionyl chloride were removed by vacuum. The acid chloride was dissolved in dichloromethane (50 mL) and used for next reaction.

The compound **1h** was prepared according to GP-1. Purification by column chromatography in petroleum ether: ethyl acetate = 3:1 gave a white solid 6.05g (81%) of **1h**. This compound is known.<sup>2</sup> <sup>1</sup>H NMR (400 MHz, CDCl<sub>3</sub>) δ 10.58 (s, 1H), 8.84 (dd, *J* = 4.2, 1.6 Hz, 1H), 8.79 – 8.72 (m, 1H), 8.13 (dd, *J* = 8.3, 1.6 Hz, 1H), 7.88 (dd, *J* = 5.4, 3.1 Hz, 2H), 7.72 (dd, *J* = 5.5, 3.0 Hz, 2H), 7.53 – 7.47 (m, 2H), 7.43 (dd, *J* = 8.3, 4.2 Hz, 1H), 4.69 (d, *J* = 10.8 Hz, 1H), 3.30 – 3.16 (m, 1H), 1.23 (d, *J* = 6.6 Hz, 3H), 0.99 (d, *J* = 6.6 Hz, 3H).

## Optimization of Reaction Conditions

## Optimization of Reaction Conditions

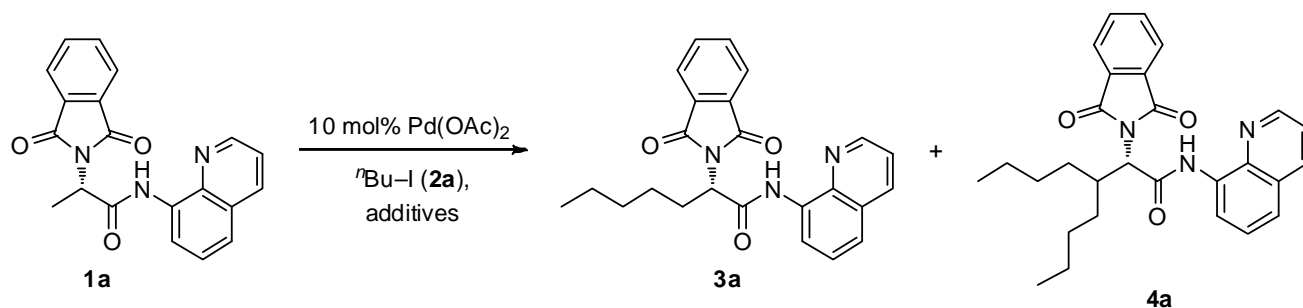

| Entry | Ag salts (eq)                         | Equiv of          |                                       | Solvents | Temp. (°C) | Time (h) | Results |       |      |
|-------|---------------------------------------|-------------------|---------------------------------------|----------|------------|----------|---------|-------|------|
|       |                                       | <sup>n</sup> Bu-I | Additive (eq)                         |          |            |          | 3a      | 4a    | RSM* |
| 1     | /                                     | 3.0               | K <sub>2</sub> CO <sub>3</sub> (1.5)  | DCE      | 90         | 24       | 5       | 0     | >60  |
| 2     | /                                     | 3.0               | K <sub>3</sub> PO <sub>4</sub> (1.5)  | DCE      | 90         | 24       | <5      | 0     | >60  |
| 3     | /                                     | 3.0               | KF (1.5)                              | DCE      | 90         | 24       | <5      | 0     | >60  |
| 4     | /                                     | 3.0               | KOPh (1.5)                            | DCE      | 90         | 24       | 0       | 0     | ~40  |
| 5     | /                                     | 3.0               | KNPhth (1.5)                          | DCE      | 90         | 24       | <2      | 0     | >60  |
| 6     | /                                     | 3.0               | Na <sub>2</sub> CO <sub>3</sub> (1.5) | DCE      | 90         | 24       | <10     | 0     | >60  |
| 7     | /                                     | 3.0               | NaOAc (1.5)                           | DCE      | 90         | 24       | <10     | 0     | >60  |
| 8     | /                                     | 3.0               | NaHCO <sub>3</sub> (1.5)              | DCE      | 90         | 24       | <5      | 0     | >60  |
| 9     | /                                     | 3.0               | LiOAc (1.5)                           | DCE      | 90         | 24       | <5      | 0     | >60  |
| 10    | AgOAc (2.0)                           | 2.0               | /                                     | DCE      | 100        | 24       | 18      | 3     | >60  |
| 11    | AgBF <sub>4</sub> (2.0)               | 2.0               | /                                     | DCE      | 100        | 24       | 0       | 0     | >40  |
| 12    | AgSbF <sub>6</sub> (2.0)              | 2.0               | /                                     | DCE      | 100        | 24       | 0       | 0     | >50  |
| 13    | AgOTf (2.0)                           | 2.0               | /                                     | DCE      | 100        | 24       | trace   | trace | ~20  |
| 14    | AgTFA (2.0)                           | 2.0               | /                                     | DCE      | 100        | 24       | 15      | 0     | >70  |
| 15    | AgClO <sub>4</sub> (2.0)              | 2.0               | /                                     | DCE      | 100        | 24       | <5      | 0     | ~20  |
| 16    | Ag <sub>2</sub> CO <sub>3</sub> (2.0) | 2.0               | /                                     | DCE      | 100        | 24       | 10      | 3     | >70  |
| 17    | Ag <sub>2</sub> O (2.0)               | 2.0               | /                                     | DCE      | 100        | 24       | 12      | 3     | >60  |
| 18    | AgF (2.0)                             | 2.0               | /                                     | DCE      | 100        | 24       | <10     | 0     | >60  |
| 19    | Ag <sub>2</sub> SO <sub>4</sub> (2.0) | 2.0               | /                                     | DCE      | 100        | 24       | <5      | 0     | ~40  |
| 20    | AgOAc (2.5)                           | 3.0               | NaOAc (2.5eq)                         | DCE      | 60         | 24       | 15      | 3     | >60  |
| 21    | AgTFA (2.5)                           | 3.0               | NaOAc (2.5eq)                         | DCE      | 60         | 24       | 23      | 0     | >60  |
| 22    | AgTFA (2.5)                           | 3.0               | /                                     | PhH      | 60         | 24       | 18      | 0     | >60  |
| 23    | AgTFA (2.5)                           | 3.0               | /                                     | Acetone  | 60         | 24       | 0       | 0     | >70  |
| 24    | AgTFA (2.5)                           | 3.0               | /                                     | THF      | 60         | 24       | 9       | 0     | >70  |

|    |                                        |     |                                |                              |    |    |    |    |     |
|----|----------------------------------------|-----|--------------------------------|------------------------------|----|----|----|----|-----|
| 25 | AgTFA (2.5)                            | 3.0 | /                              | PhMe                         | 60 | 24 | 13 | 0  | >70 |
| 26 | Ag <sub>2</sub> CO <sub>3</sub> (1.25) | 5.0 | /                              | DCE/ <sup>t</sup> BuOH = 4:1 | 75 | 20 | 10 | 5  | >70 |
| 27 | Ag <sub>2</sub> CO <sub>3</sub> (1.25) | 5.0 | NaCl (1.25)                    | DCE/ <sup>t</sup> BuOH = 4:1 | 75 | 20 | 10 | 5  | >70 |
| 28 | Ag <sub>2</sub> CO <sub>3</sub> (1.25) | 5.0 | NaOAc (1.25)                   | DCE/ <sup>t</sup> BuOH = 4:1 | 75 | 20 | 11 | 5  | >70 |
| 29 | Ag <sub>2</sub> CO <sub>3</sub> (1.25) | 5.0 | KOCN (1.25)                    | DCE/ <sup>t</sup> BuOH = 4:1 | 75 | 20 | 19 | 26 | 44  |
| 30 | Ag <sub>2</sub> CO <sub>3</sub> (1.25) | 5.0 | KCN (1.25)                     | DCE/ <sup>t</sup> BuOH = 4:1 | 75 | 20 | 11 | 3  | >70 |
| 31 | Ag <sub>2</sub> CO <sub>3</sub> (1.25) | 5.0 | KF (1.25)                      | DCE/ <sup>t</sup> BuOH = 4:1 | 75 | 20 | 9  | 5  | >70 |
| 32 | Ag <sub>2</sub> CO <sub>3</sub> (1.25) | 5.0 | NaBF <sub>4</sub> (1.25)       | DCE/ <sup>t</sup> BuOH = 4:1 | 75 | 20 | 8  | 3  | >70 |
| 33 | Ag <sub>2</sub> O (1.25)               | 5.0 | KOCN (1.25)                    | DCE/ <sup>t</sup> BuOH = 4:1 | 75 | 20 | 21 | 7  | 51  |
| 34 | AgF (1.25)                             | 5.0 | KOCN (1.25)                    | DCE/ <sup>t</sup> BuOH = 4:1 | 75 | 20 | 30 | 11 | 59  |
| 35 | AgTFA (1.25)                           | 5.0 | KOCN (1.25)                    | DCE/ <sup>t</sup> BuOH = 4:1 | 75 | 20 | 29 | 0  | 66  |
| 36 | AgOCN (1.25)                           | 5.0 | KOCN (1.25)                    | DCE/ <sup>t</sup> BuOH = 4:1 | 75 | 20 | 34 | 14 | 50  |
| 37 | AgSCN (1.25)                           | 5.0 | KOCN (1.25)                    | DCE/ <sup>t</sup> BuOH = 4:1 | 75 | 20 | 0  | 0  | >95 |
| 38 | AgOCN (1.25)                           | 5.0 | KOCN (1.25) +<br>LiCl(1.25)    | DCE/ <sup>t</sup> BuOH = 4:1 | 75 | 20 | 50 | 0  | 48  |
| 39 | Ag <sub>2</sub> CO <sub>3</sub> (1.25) | 5.0 | KOCN (1.25) +<br>LiCl(1.25)    | DCE/ <sup>t</sup> BuOH = 4:1 | 75 | 20 | 33 | 18 | 47  |
| 40 | Ag <sub>2</sub> CO <sub>3</sub> (1.25) | 5.0 | PivOH (1.25)                   | DCE/ <sup>t</sup> BuOH = 4:1 | 75 | 20 | 28 | 5  | 57  |
| 41 | Ag <sub>2</sub> CO <sub>3</sub> (1.25) | 5.0 | Ph <sub>3</sub> CCOOH (1.25)   | DCE/ <sup>t</sup> BuOH = 4:1 | 75 | 20 | 49 | 5  | 40  |
| 42 | Ag <sub>2</sub> CO <sub>3</sub> (1.25) | 5.0 | MesCOOH (1.25)                 | DCE/ <sup>t</sup> BuOH = 4:1 | 75 | 20 | 34 | 6  | 44  |
| 43 | Ag <sub>2</sub> CO <sub>3</sub> (1.25) | 5.0 | TsOH (1.25)                    | DCE/ <sup>t</sup> BuOH = 4:1 | 75 | 20 | 0  | 0  | >70 |
| 44 | Ag <sub>2</sub> CO <sub>3</sub> (1.25) | 5.0 | Ph <sub>2</sub> CHCOOH (1.25)  | DCE/ <sup>t</sup> BuOH = 4:1 | 75 | 20 | 38 | 4  | 46  |
| 45 | Ag <sub>2</sub> CO <sub>3</sub> (1.25) | 5.0 | Bz-N-Leu-OH (1.25)             | DCE/ <sup>t</sup> BuOH = 4:1 | 75 | 20 | 21 | 4  | >50 |
| 46 | Ag <sub>2</sub> CO <sub>3</sub> (1.25) | 5.0 | Boc-N-gly-OH<br>(1.25)         | DCE/ <sup>t</sup> BuOH = 4:1 | 75 | 20 | 18 | 6  | >60 |
| 47 | Ag <sub>2</sub> CO <sub>3</sub> (1.25) | 5.0 | Boc-N-Ile-OH (1.25)            | DCE/ <sup>t</sup> BuOH = 4:1 | 75 | 20 | 16 | 7  | >70 |
| 48 | Ag <sub>2</sub> CO <sub>3</sub> (1.25) | 5.0 | BINA-POOH (1.25)               | DCE/ <sup>t</sup> BuOH = 4:1 | 75 | 20 | 78 | 1  | 15  |
| 49 | Ag <sub>2</sub> CO <sub>3</sub> (1.25) | 5.0 | (BnO) <sub>2</sub> POOH (1.25) | DCE/ <sup>t</sup> BuOH = 4:1 | 75 | 20 | 76 | 4  | 7   |
| 50 | Ag <sub>2</sub> CO <sub>3</sub> (1.25) | 5.0 | BINA-POOH (0.5)                | DCE/ <sup>t</sup> BuOH = 4:1 | 75 | 20 | 58 | 2  | 27  |
| 51 | Ag <sub>2</sub> CO <sub>3</sub> (1.25) | 5.0 | (BnO) <sub>2</sub> POOH (0.5)  | DCE/ <sup>t</sup> BuOH = 4:1 | 75 | 20 | 72 | 5  | 9   |
| 52 | Ag <sub>2</sub> O (1.25)               | 5.0 | (BnO) <sub>2</sub> POOH (0.5)  | DCE/ <sup>t</sup> BuOH = 4:1 | 75 | 20 | 28 | 4  | 50  |
| 53 | AgOCN (1.25)                           | 5.0 | (BnO) <sub>2</sub> POOH (0.5)  | DCE/ <sup>t</sup> BuOH = 4:1 | 75 | 20 | 49 | 0  | 48  |
| 54 | AgF (1.25)                             | 5.0 | (BnO) <sub>2</sub> POOH (0.5)  | DCE/ <sup>t</sup> BuOH = 4:1 | 75 | 20 | 33 | 0  | 64  |
| 55 | AgNO <sub>3</sub> (1.25)               | 5.0 | (BnO) <sub>2</sub> POOH (0.5)  | DCE/ <sup>t</sup> BuOH = 4:1 | 75 | 20 | 0  | 0  | >80 |
| 56 | Ag <sub>2</sub> SO <sub>4</sub> (1.25) | 5.0 | (BnO) <sub>2</sub> POOH (0.5)  | DCE/ <sup>t</sup> BuOH = 4:1 | 75 | 20 | 12 | 0  | >60 |
| 57 | AgSCN (1.25)                           | 5.0 | (BnO) <sub>2</sub> POOH (0.5)  | DCE/ <sup>t</sup> BuOH = 4:1 | 75 | 20 | 5  | 0  | >80 |

|    |                                        |     |                                                                 |                              |    |    |    |    |    |
|----|----------------------------------------|-----|-----------------------------------------------------------------|------------------------------|----|----|----|----|----|
| 58 | AgOAc (1.25)                           | 5.0 | (BnO) <sub>2</sub> POOH (0.5)                                   | DCE/ <sup>t</sup> BuOH = 4:1 | 75 | 20 | 38 | 6  | 41 |
| 59 | Ag <sub>2</sub> CO <sub>3</sub> (1.25) | 5.0 | (BnO) <sub>2</sub> POOH (0.5) +<br>LiCl (1.25)                  | DCE/ <sup>t</sup> BuOH = 4:1 | 75 | 20 | 53 | 5  | 29 |
| 60 | Ag <sub>2</sub> CO <sub>3</sub> (1.25) | 5.0 | (BnO) <sub>2</sub> POOH (0.5) +<br>KOCN (1.25)                  | DCE/ <sup>t</sup> BuOH = 4:1 | 75 | 20 | 22 | 19 | 43 |
| 61 | Ag <sub>2</sub> CO <sub>3</sub> (1.25) | 5.0 | (BnO) <sub>2</sub> POOH (0.5) +<br>KOCN (1.25) + LiCl<br>(1.25) | DCE/ <sup>t</sup> BuOH = 4:1 | 75 | 20 | 54 | 0  | 31 |
| 62 | Ag <sub>2</sub> CO <sub>3</sub> (1.25) | 5.0 | (BnO) <sub>2</sub> POOH (0.5)                                   | DCE/ <sup>t</sup> BuOH = 4:1 | 75 | 20 | 72 | 5  | 9  |
| 63 | Ag <sub>2</sub> CO <sub>3</sub> (1.0)  | 3.0 | (BnO) <sub>2</sub> POOH (0.4)                                   | DCE/ <sup>t</sup> BuOH = 4:1 | 75 | 2  | 70 | 5  | 10 |
| 64 | Ag <sub>2</sub> CO <sub>3</sub> (1.0)  | 3.0 | (BnO) <sub>2</sub> POOH (0.4)                                   | DCE/ <sup>t</sup> BuOH = 4:1 | 65 | 2  | 70 | 5  | 11 |
| 65 | Ag <sub>2</sub> CO <sub>3</sub> (1.0)  | 3.0 | (BnO) <sub>2</sub> POOH (0.4)                                   | DCE/ <sup>t</sup> BuOH = 4:1 | 55 | 2  | 69 | 5  | 11 |
| 66 | Ag <sub>2</sub> CO <sub>3</sub> (1.0)  | 3.0 | (BnO) <sub>2</sub> POOH (0.4)                                   | DCE/ <sup>t</sup> BuOH = 4:1 | 40 | 4  | 46 | 0  | 44 |
| 67 | Ag <sub>2</sub> CO <sub>3</sub> (1.0)  | 2.0 | (BnO) <sub>2</sub> POOH (0.4)                                   | DCE/ <sup>t</sup> BuOH = 4:1 | 50 | 2  | 64 | 0  | 28 |
| 68 | Ag <sub>2</sub> CO <sub>3</sub> (0.8)  | 2.0 | (BnO) <sub>2</sub> POOH (0.3)                                   | DCE/ <sup>t</sup> BuOH = 2:1 | 75 | 2  | 78 | 6  | 7  |
| 69 | Ag <sub>2</sub> CO <sub>3</sub> (0.8)  | 1.5 | (BnO) <sub>2</sub> POOH (0.3)                                   | DCE/ <sup>t</sup> BuOH = 3:2 | 75 | 2  | 80 | 3  | 4  |
| 70 | Ag <sub>2</sub> CO <sub>3</sub> (0.8)  | 1.5 | (BnO) <sub>2</sub> POOH (0.3)                                   | DCE/ <sup>t</sup> BuOH = 1:1 | 75 | 2  | 80 | 8  | 0  |
| 71 | Ag <sub>2</sub> CO <sub>3</sub> (0.8)  | 2.0 | (BnO) <sub>2</sub> POOH (0.3)                                   | DCE/ <sup>t</sup> BuOH = 2:1 | 50 | 2  | 81 | 0  | 8  |
| 72 | Ag <sub>2</sub> CO <sub>3</sub> (0.8)  | 1.5 | (BnO) <sub>2</sub> POOH (0.3)                                   | DCE/ <sup>t</sup> BuOH = 1:1 | 50 | 2  | 85 | 0  | 3  |

\*RSM = Recovered Starting Material

### General Procedure (GP-2) for Alkylation of Primary C(sp<sup>3</sup>)-H Bonds

To a 30- mL resealable Schlenk flask was added *N*-phthaloyl-alanine 8-aminoquinoline amide (**1**) (0.2 mmol, overall concentration = 0.133 mol/L), Pd(OAc)<sub>2</sub> (4.5 mg, 0.02 mmol), alkyl iodide (**2**) or alkyl bromine (**2'**) (0.3-0.6 mmol), Ag<sub>2</sub>CO<sub>3</sub> (0.16-0.25 mmol), (BnO)<sub>2</sub>POOH (0.06-0.08 mmol), DCE/*t*-BuOH (1.5 mL). The flask was then charged with N<sub>2</sub>. The mixture was stirred at 50 to 75°C for 2 to 12 hours under N<sub>2</sub>. After cooling to room temperature, the reaction was diluted with dichloromethane (5 mL) and then filtered through a pad of Celite and washed by dichloromethane (30 mL). Evaporation of organic solvent and purification by column chromatography gave the corresponding product.

#### The reaction conditions for alkyl iodide (**2**):

(a) **1** (0.2mmol, 1.0eq), **2** (1.5eq), Pd(OAc)<sub>2</sub> (10 mol%), Ag<sub>2</sub>CO<sub>3</sub> (0.8eq), (BnO)<sub>2</sub>POOH (0.3eq), DCE/*t*-BuOH = 1:1, 50°C, 2h;

(b) **1** (0.2mmol, 1.0eq), **2** (2.5eq), Pd(OAc)<sub>2</sub> (10 mol%), Ag<sub>2</sub>CO<sub>3</sub> (1.25eq), (BnO)<sub>2</sub>POOH (0.4eq), DCE/*t*-BuOH = 1:2, 60°C, 12h;

(c) **1** (0.2mmol, 1.0eq), **2** (1.5eq), Pd(OAc)<sub>2</sub> (10 mol%), Ag<sub>2</sub>CO<sub>3</sub> (0.8eq), (BnO)<sub>2</sub>POOH (0.3eq), DCE/*t*-BuOH = 1:1, 75°C, 2h;

(d) **1** (0.2mmol, 1.0eq), **2** (2.0eq), Pd(OAc)<sub>2</sub> (10 mol%), Ag<sub>2</sub>CO<sub>3</sub> (1.0eq), (BnO)<sub>2</sub>POOH (0.4eq), DCE/*t*-BuOH = 1:1, 65°C, 4h;

#### The reaction conditions for alkyl bromine (**2'**):

(e) **1** (0.2mmol, 1.0eq), **2'** (2.0eq), Pd(OAc)<sub>2</sub> (10 mol%), Ag<sub>2</sub>CO<sub>3</sub> (1.0eq), (BnO)<sub>2</sub>POOH (0.3eq), DCE/*t*-BuOH = 1:1, 75°C, 16h;

(f) **1** (0.2mmol, 1.0eq), **2'** (3.0eq), Pd(OAc)<sub>2</sub> (15 mol%), Ag<sub>2</sub>CO<sub>3</sub> (1.5eq), (BnO)<sub>2</sub>POOH (0.5eq), DCE/*t*-BuOH = 1:1, 90°C, 24h;

(g) **1** (0.2mmol, 1.0eq), **2'** (1.5eq), Pd(OAc)<sub>2</sub> (10 mol%), Ag<sub>2</sub>CO<sub>3</sub> (0.8eq), (BnO)<sub>2</sub>POOH (0.3eq), DCE/*t*-BuOH = 1:1, 60°C, 4h;

(h) **1** (0.2mmol, 1.0eq), **2'** (1.5eq), Pd(OAc)<sub>2</sub> (10 mol%), Ag<sub>2</sub>CO<sub>3</sub> (0.8eq), (BnO)<sub>2</sub>POOH (0.3eq), DCE/*t*-BuOH = 1:1, 90°C, 14h.

### (*S*)-2-(1,3-Dioxoisindolin-2-yl)-*N*-(quinolin-8-yl)heptanamide (**3a**)

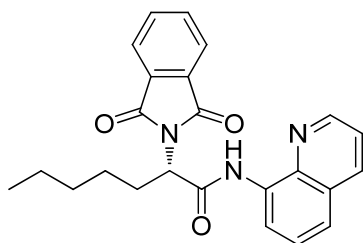

The compound **3a** was prepared according to the GP-2 under condition (a), (f) and purified by column chromatography in petroleum ether: dichloromethane: acetone = 6:3:1. **3a** was obtained as a white solid

(68.4 mg, 85%) under condition (a); (47.8 mg, 60%) under condition (f).  $^1\text{H}$  NMR (400 MHz,  $\text{CDCl}_3$ )  $\delta$  10.34 (s, 1H), 8.78 – 8.64 (m, 2H), 8.13 (dd,  $J = 8.2, 1.1$  Hz, 1H), 7.90 (dd,  $J = 5.3, 3.1$  Hz, 2H), 7.75 (dd,  $J = 5.3, 3.1$  Hz, 2H), 7.54 – 7.46 (m, 2H), 7.41 (dd,  $J = 8.2, 4.2$  Hz, 1H), 5.13 (dd,  $J = 10.9, 5.3$  Hz, 1H), 2.64 – 2.52 (m, 1H), 2.44 – 2.33 (m, 1H), 1.50 – 1.30 (m, 6H), 0.88 (t,  $J = 7.1$  Hz, 3H);  $^{13}\text{C}$  NMR (101 MHz,  $\text{CDCl}_3$ )  $\delta$  168.26, 167.23, 148.46, 138.65, 136.39, 134.33, 134.09, 131.98, 127.98, 127.42, 123.72, 122.00, 121.74, 116.82, 55.44, 31.34, 28.84, 26.49, 22.59, 14.10; HRMS (EI)  $m/z$ : 401.1740 ( $\text{M}^+$ ); calc. for  $\text{C}_{24}\text{H}_{23}\text{N}_3\text{O}_3$ : 401.1739; HPLC Chiralpack<sup>®</sup> AS-H column followed by AD-H column (*n*-hexane/isopropanol = 60:40, 0.5 mL/min),  $t_r = 37.872$  min (major), 42.050 min (minor), 99.1% ee (condition a), 98.9% ee (condition f).

### Chiral HPLC Data

#### HPLC Conditions:

Chiral stationary phase: Chiralpack<sup>®</sup> AS-H followed by Chiralpack<sup>®</sup> AD-H, *n*-hexane/isopropanol = 60:40, 0.5 mL/min

Signal: VWD1A, Wavelength = 220 nm

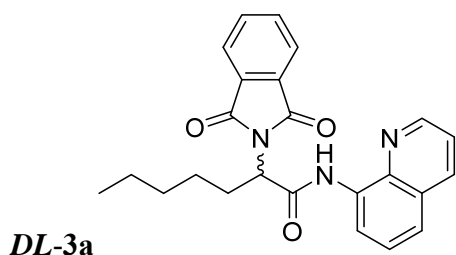

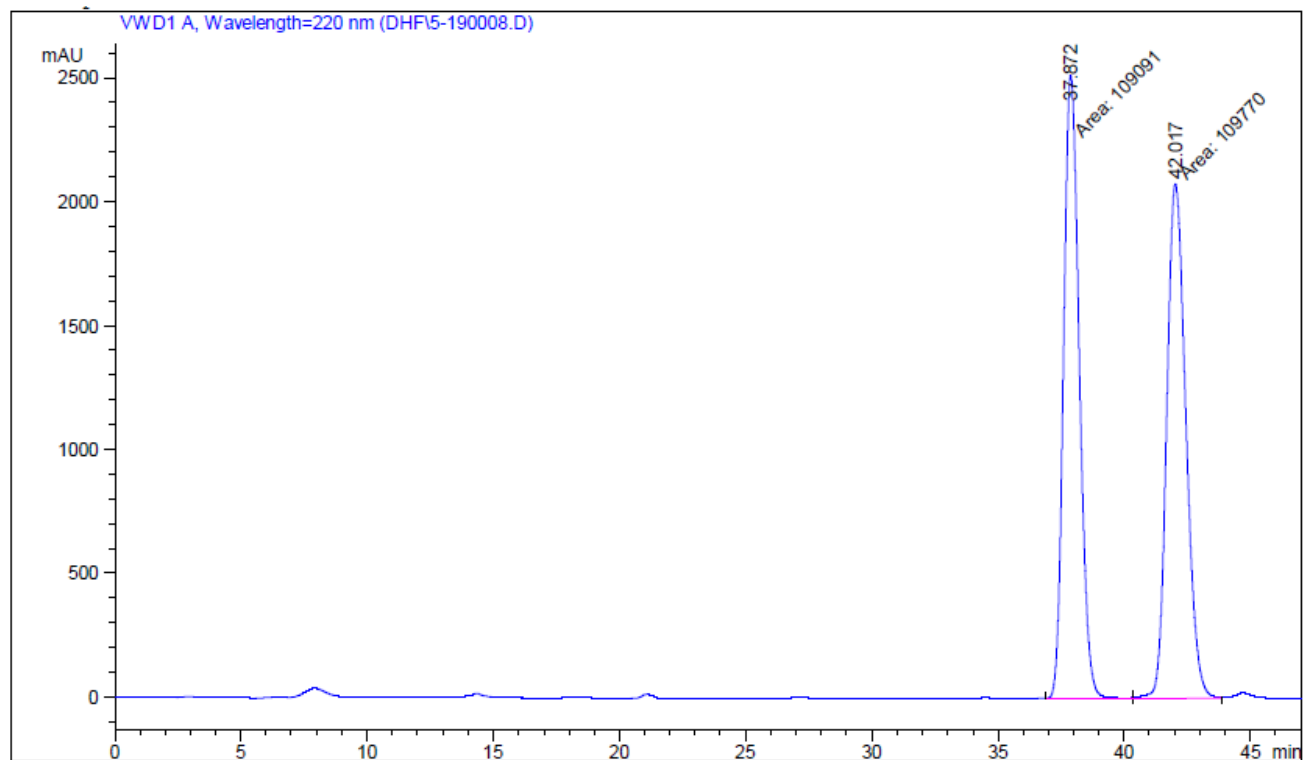

**Area% report for DL-3a:**

| Retention Time (min) | Area (mAU*s) | Area %   | Height (mAU) | Height % |
|----------------------|--------------|----------|--------------|----------|
| 37.872               | 1.09091e5    | 49.8449  | 2520.27319   | 54.7888  |
| 42.017               | 1.09770e5    | 50.1551  | 2079.70850   | 45.2112  |
| Totals               | 2.18861e5    | 100.0000 | 4599.98169   | 100.00   |

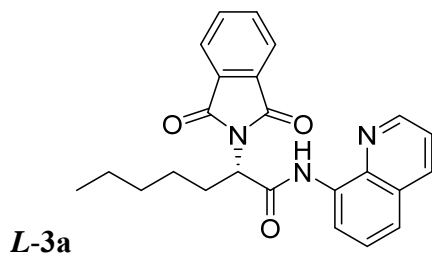



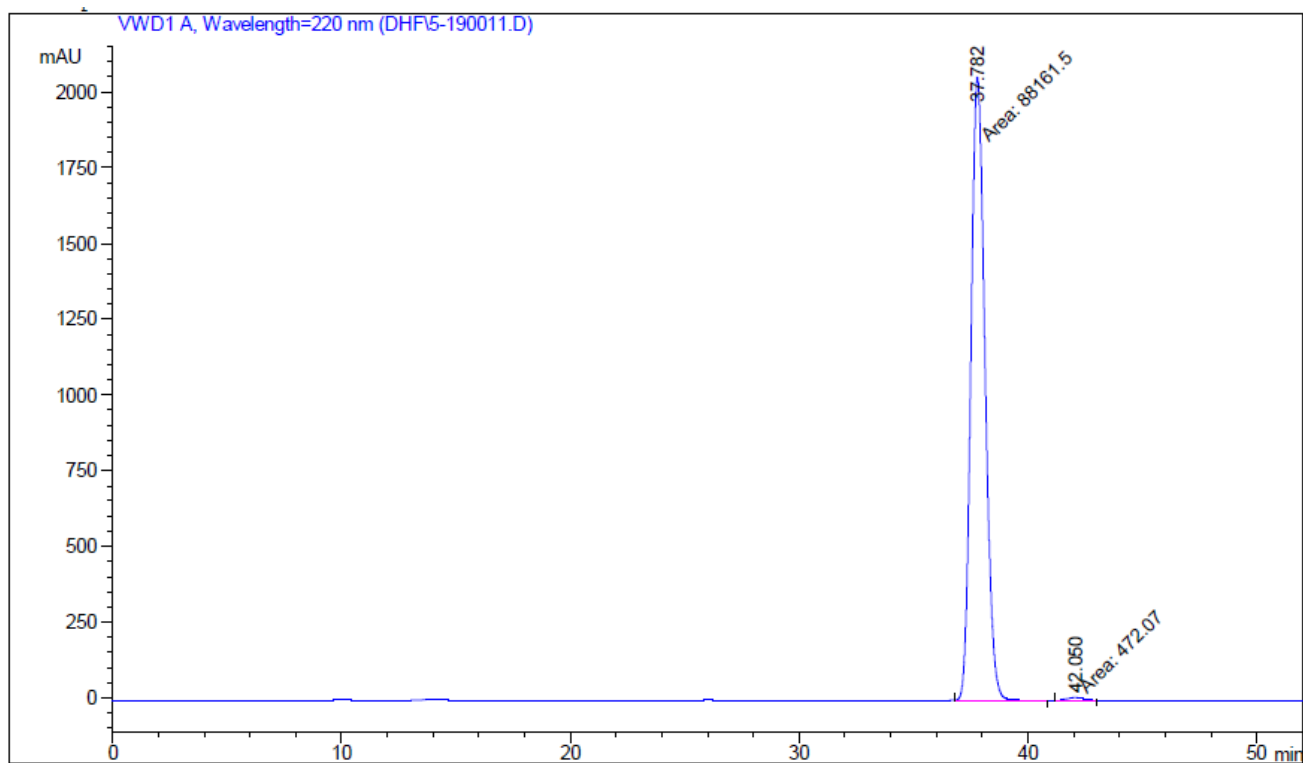

**Area% report for L-3a obtained under condition (a):**

| Retention Time (min) | Area (mAU*s) | Area %   | Height (mAU) | Height % |
|----------------------|--------------|----------|--------------|----------|
| 37.782               | 8.81615e4    | 99.4676  | 2060.91479   | 99.5543  |
| 42.050               | 472.07037    | 0.5326   | 9.22753      | 0.4457   |
| Totals               | 8.86336e4    | 100.0000 | 2070.14233   | 100.0000 |

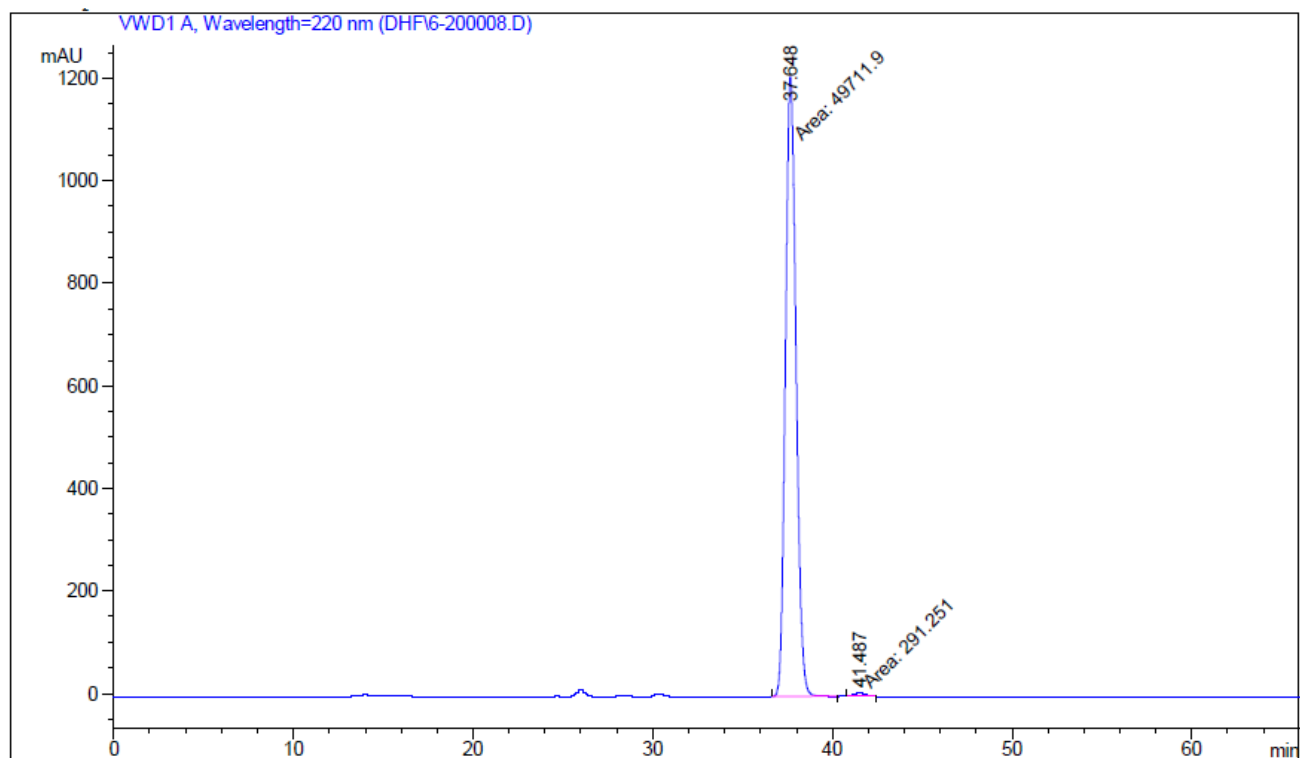

**Area% report for *L*-3a obtained under condition (f):**

| Retention Time (min) | Area (mAU*s) | Area %   | Height (mAU) | Height % |
|----------------------|--------------|----------|--------------|----------|
| 37.648               | 4.97119e4    | 99.4175  | 1211.19080   | 99.4823  |
| 41.487               | 291.25140    | 0.5825   | 6.30312      | 0.5177   |
| Totals               | 5.00031e4    | 100.0000 | 1217.49391   | 100.0000 |

**(*S*)-3-Butyl-2-(1,3-dioxisoindolin-2-yl)-*N*-(quinolin-8-yl)heptanamide (**4a**)**

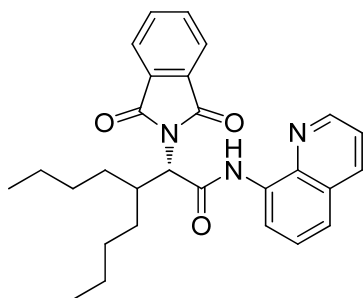

The compound **4a** was obtained as a colorless oil.  $^1\text{H}$  NMR (400 MHz,  $\text{CDCl}_3$ )  $\delta$  10.60 (s, 1H), 8.85 (dd,  $J = 4.2, 1.6$  Hz, 1H), 8.78 – 8.72 (m, 1H), 8.13 (dd,  $J = 8.3, 1.6$  Hz, 1H), 7.88 (dd,  $J = 5.5, 3.0$  Hz, 2H), 7.72 (dd,  $J = 5.5, 3.0$  Hz, 2H), 7.52 – 7.48 (m, 2H), 7.44 (dd,  $J = 8.3, 4.2$  Hz, 1H), 4.95 (d,  $J = 10.8$  Hz, 1H), 3.11 – 2.98 (m, 1H), 1.59 – 1.42 (m, 4H), 1.35 – 1.13 (m, 8H), 0.88 – 0.79 (m, 6H);  $^{13}\text{C}$  NMR (101 MHz,

$\text{CDCl}_3$ )  $\delta$  168.37, 167.26, 148.60, 138.87, 136.27, 134.45, 134.35, 131.76, 128.03, 127.36, 123.75, 122.05, 121.74, 117.15, 60.29, 36.15, 29.80, 29.15, 28.35, 27.49, 23.13, 23.06, 14.12, 14.08; HRMS (EI)  $m/z$ : 457.2370 ( $\text{M}^+$ ); calc. for  $\text{C}_{28}\text{H}_{31}\text{N}_3\text{O}_3$ : 457.2365.

**(S)-2-(1,3-Dioxisoindolin-2-yl)-N-(quinolin-8-yl)butanamide (3b)**

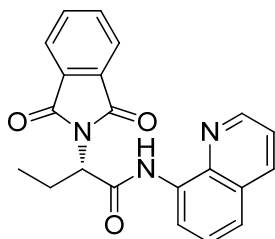

The compound **3b** was prepared according to the **GP-2** under condition (a) and purified by column chromatography in petroleumether: dichloromethane: ethyl acetate = 6:3:1. **3b** was obtained as a white solid (39.7 mg, 55%).  $^1\text{H}$  NMR (400 MHz,  $\text{CDCl}_3$ )  $\delta$  10.33 (s, 1H), 8.71 (dd,  $J$  = 5.4, 3.6 Hz, 1H), 8.69 (dd,  $J$  = 4.1, 1.3 Hz, 1H), 8.11 (dd,  $J$  = 8.3, 1.2 Hz, 1H), 7.89 (dd,  $J$  = 5.5, 3.0 Hz, 2H), 7.74 (dd,  $J$  = 5.4, 3.1 Hz, 2H), 7.52 – 7.45 (m, 2H), 7.40 (dd,  $J$  = 8.3, 4.2 Hz, 1H), 5.05 (dd,  $J$  = 10.9, 5.4 Hz, 1H), 2.66 – 2.53 (m, 1H), 2.53 – 2.41 (m, 1H), 1.07 (t,  $J$  = 7.4 Hz, 3H);  $^{13}\text{C}$  NMR (101 MHz,  $\text{CDCl}_3$ )  $\delta$  168.26, 167.03, 148.43, 138.59, 136.37, 134.32, 134.02, 131.91, 127.94, 127.37, 123.68, 122.00, 121.72, 116.78, 56.87, 22.28, 11.29; HRMS (EI)  $m/z$ : 359.1267 ( $\text{M}^+$ ); calc. for  $\text{C}_{21}\text{H}_{17}\text{N}_3\text{O}_3$ : 359.1270.

**(S)-2-(1,3-Dioxisoindolin-2-yl)-3-methyl-N-(quinolin-8-yl)butanamide (3b')**

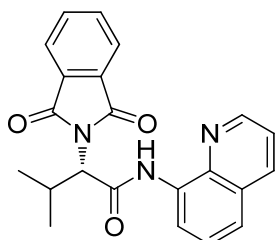

The compound **3b'** was obtained as a white solid (31.5 mg, 42%). This compound is the same as **1h**.

**(S)-2-(1,3-Dioxisoindolin-2-yl)-N-(quinolin-8-yl)pentanamide (3c)**

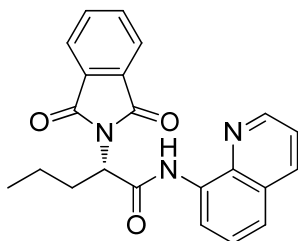

The compound **3c** was prepared according to the **GP-2** under condition (a), (f) and purified by column chromatography in petroleumether: dichloromethane: ethyl acetate = 6:3:1. **3c** was obtained as a white

solid (59.2 mg, 79%) under condition (a); (40.8 mg, 55%) under condition (f). This compound is the same as **1b**.

**(S)-2-(1,3-Dioxisoindolin-2-yl)-N-(quinolin-8-yl)hexanamide (3d)**

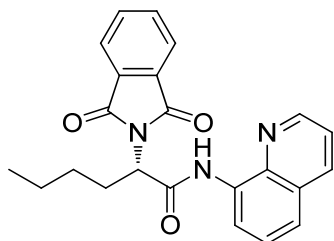

The compound **3d** was prepared according to the **GP-2** under condition (a), (f) and purified by column chromatography in petroleumether: dichloromethane: ethyl acetate = 6:3:1. **3-d** was obtained as a white solid (65.3 mg, 84%) under condition (a); (41.9mg, 54%) under condition (f). <sup>1</sup>H NMR (400 MHz, CDCl<sub>3</sub>) δ 10.33 (s, 1H), 8.71 (dd, *J* = 5.6, 3.4 Hz, 1H), 8.69 – 8.64 (m, 1H), 8.13 – 8.07 (m, 1H), 7.88 (dd, *J* = 5.5, 3.1 Hz, 2H), 7.73 (dd, *J* = 5.5, 3.0 Hz, 2H), 7.51 – 7.45 (m, 2H), 7.38 (dd, *J* = 8.3, 4.2 Hz, 1H), 5.12 (dd, *J* = 10.9, 5.3 Hz, 1H), 2.64 – 2.53 (m, 1H), 2.45 – 2.35 (m, 1H), 1.54 – 1.32 (m, 4H), 0.92 (t, *J* = 7.0 Hz, 3H); <sup>13</sup>C NMR (101 MHz, CDCl<sub>3</sub>) δ 168.20, 167.17, 148.40, 138.55, 136.33, 134.29, 134.00, 131.90, 127.91, 127.33, 123.65, 121.97, 121.69, 116.73, 55.34, 28.86, 28.53, 22.25, 13.99; HRMS (EI) *m/z*: 387.1576 (M<sup>+</sup>); calc. for C<sub>23</sub>H<sub>21</sub>N<sub>3</sub>O<sub>3</sub>: 387.1583.

**(S)-2-(1,3-Dioxisoindolin-2-yl)-6-methyl-N-(quinolin-8-yl)heptanamide (3e)**

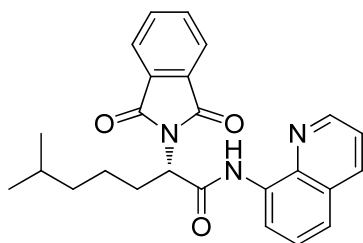

The compound **3e** was prepared according to the **GP-2** under condition (a), (f) and purified by column chromatography in petroleumether: dichloromethane: ethyl acetate = 6:3:1. **3-e** was obtained as a white solid (71.0 mg, 85%) under condition (a); (35.4 mg, 43%) under condition (f). <sup>1</sup>H NMR (400 MHz, CDCl<sub>3</sub>) δ 10.33 (s, 1H), 8.71 (dd, *J* = 5.4, 3.6 Hz, 1H), 8.67 (dd, *J* = 4.2, 1.3 Hz, 1H), 8.10 (dd, *J* = 8.2, 1.0 Hz, 1H), 7.88 (dd, *J* = 5.4, 3.1 Hz, 2H), 7.73 (dd, *J* = 5.4, 3.1 Hz, 2H), 7.51 – 7.43 (m, 2H), 7.38 (dd, *J* = 8.3, 4.2 Hz, 1H), 5.13 (dd, *J* = 10.8, 5.4 Hz, 1H), 2.64 – 2.51 (m, 1H), 2.43 – 2.31 (m, 1H), 1.60 – 1.50 (m, 1H), 1.49 – 1.37 (m, 2H), 1.36 – 1.27 (m, 2H), 0.85 (dd, *J* = 6.6, 4.9 Hz, 6H); <sup>13</sup>C NMR (101 MHz, CDCl<sub>3</sub>) δ 168.20, 167.16, 148.39, 138.54, 136.33, 134.29, 134.00, 131.88, 127.90, 127.32, 123.64, 121.96, 121.69, 116.73, 55.36, 38.30, 29.05, 27.85, 24.58, 22.75, 22.44; HRMS (EI) *m/z*: 415.1903 (M<sup>+</sup>); calc. for C<sub>25</sub>H<sub>25</sub>N<sub>3</sub>O<sub>3</sub>: 415.1896.

**(S)-2-(1,3-Dioxisoindolin-2-yl)-N-(quinolin-8-yl)hencicosanamide (3f)**

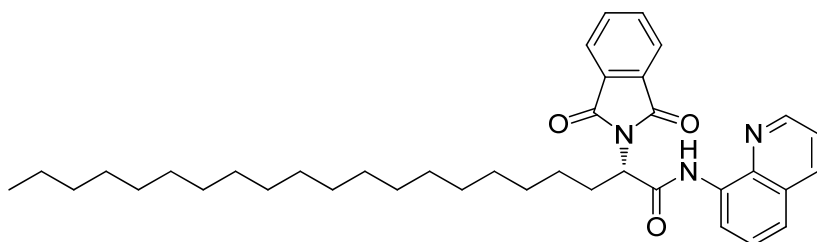

The compound **3f** was prepared according to the **GP-2** under condition (a) and purified by column chromatography in petroleum ether: dichloromethane: ethyl acetate = 6:3:1. **3f** was obtained as a white solid (103.4 mg, 87%).  $^1\text{H}$  NMR (400 MHz,  $\text{CDCl}_3$ )  $\delta$  10.33 (s, 1H), 8.71 (dd,  $J$  = 5.8, 3.1 Hz, 1H), 8.69 – 8.61 (m, 1H), 8.09 (d,  $J$  = 7.5 Hz, 1H), 7.87 (dd,  $J$  = 5.2, 2.2 Hz, 2H), 7.72 (dd,  $J$  = 5.3, 2.5 Hz, 2H), 7.47 (dd,  $J$  = 8.6, 5.4 Hz, 2H), 7.37 (dd,  $J$  = 8.1, 4.2 Hz, 1H), 5.13 (dd,  $J$  = 10.8, 5.3 Hz, 1H), 2.66 – 2.52 (m, 1H), 2.47 – 2.32 (m, 1H), 1.48 – 1.37 (m, 4H), 1.28 – 1.21 (m, 28H), 0.87 (t,  $J$  = 6.7 Hz, 3H);  $^{13}\text{C}$  NMR (101 MHz,  $\text{CDCl}_3$ )  $\delta$  168.16, 167.15, 148.35, 138.53, 136.29, 134.24, 134.01, 131.90, 127.89, 127.31, 123.61, 121.93, 121.65, 116.72, 55.36, 31.99, 29.77, 29.74, 29.72, 29.71, 29.66, 29.59, 29.48, 29.43, 29.11, 28.81, 26.76, 22.75, 14.19; HRMS (EI)  $m/z$ : 597.3950 ( $\text{M}^+$ ); calc. for  $\text{C}_{38}\text{H}_{51}\text{N}_3\text{O}_3$ : 597.3930.

**(S)-5-Cyclohexyl-2-(1,3-dioxoisindolin-2-yl)-N-(quinolin-8-yl)pentanamide (3g)**

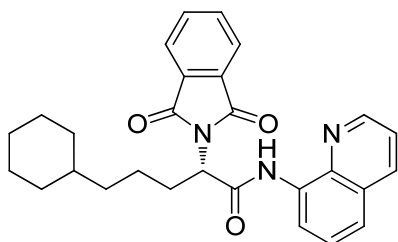

The compound **3g** was prepared according to the **GP-2** under condition (a) and purified by column chromatography in petroleum ether: dichloromethane: ethyl acetate = 6:3:1. **3g** was obtained as a colorless oil (69.3 mg, 76%).  $^1\text{H}$  NMR (400 MHz,  $\text{CDCl}_3$ )  $\delta$  10.33 (s, 1H), 8.70 (dd,  $J$  = 5.3, 3.7 Hz, 1H), 8.67 (dd,  $J$  = 3.9, 2.0 Hz, 1H), 8.09 (dd,  $J$  = 8.3, 1.6 Hz, 1H), 7.88 (dd,  $J$  = 5.3, 3.1 Hz, 2H), 7.72 (dd,  $J$  = 5.3, 3.1 Hz, 2H), 7.51 – 7.44 (m, 2H), 7.38 (dd,  $J$  = 8.2, 4.0 Hz, 1H), 5.13 (dd,  $J$  = 10.8, 5.3 Hz, 1H), 2.65 – 2.50 (m, 1H), 2.42 – 2.30 (m, 1H), 1.67 – 1.57 (m, 5H), 1.54 – 1.38 (m, 2H), 1.36 – 1.25 (m, 2H), 1.23 – 1.07 (m, 4H), 0.89 – 0.80 (m, 2H);  $^{13}\text{C}$  NMR (101 MHz,  $\text{CDCl}_3$ )  $\delta$  168.19, 167.17, 148.38, 138.53, 136.31, 134.27, 133.99, 131.88, 127.89, 127.30, 123.63, 121.95, 121.68, 116.72, 55.36, 37.47, 36.84, 33.47, 33.19, 29.10, 26.68, 26.40, 26.37, 24.05; HRMS (EI)  $m/z$ : 455.2204 ( $\text{M}^+$ ); calc. for  $\text{C}_{28}\text{H}_{29}\text{N}_3\text{O}_3$ : 455.2209.

**(S)-2-(1,3-Dioxoisindolin-2-yl)-5-phenyl-N-(quinolin-8-yl)pentanamide (3h)**

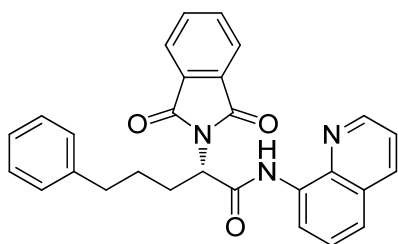

The compound **3h** was prepared according to the **GP-2** under condition (**b**) and purified by column chromatography in petroleum ether: dichloromethane: ethyl acetate = 6:3:1. **3h** was obtained as a white solid (63.2 mg, 70%).  $^1\text{H}$  NMR (400 MHz,  $\text{CDCl}_3$ )  $\delta$  10.33 (s, 1H), 8.72 (dd,  $J = 5.2, 3.5$  Hz, 1H), 8.69 – 8.54 (m, 1H), 8.12 (d,  $J = 8.2$  Hz, 1H), 7.89 (dd,  $J = 4.9, 3.1$  Hz, 2H), 7.74 (dd,  $J = 5.1, 3.1$  Hz, 2H), 7.54 – 7.46 (m, 2H), 7.40 (dd,  $J = 8.2, 4.2$  Hz, 1H), 7.34 – 7.13 (m, 5H), 5.18 (dd,  $J = 10.9, 5.2$  Hz, 1H), 2.84 – 2.71 (m, 2H), 2.70 – 2.60 (m, 1H), 2.53 – 2.40 (m, 1H), 1.84 – 1.75 (m, 2H);  $^{13}\text{C}$  NMR (101 MHz,  $\text{CDCl}_3$ )  $\delta$  168.17, 166.93, 148.39, 141.65, 138.54, 136.34, 134.33, 133.96, 131.86, 128.51, 128.49, 127.91, 127.34, 126.03, 123.69, 122.01, 121.71, 116.75, 55.08, 35.30, 28.57, 28.42; HRMS (EI)  $m/z$ : 449.1738 ( $\text{M}^+$ ); calc. for  $\text{C}_{28}\text{H}_{23}\text{N}_3\text{O}_3$ : 449.1739.

**(S)-6-Chloro-2-(1,3-dioxoisoindolin-2-yl)-N-(quinolin-8-yl)hexanamide (3i)**

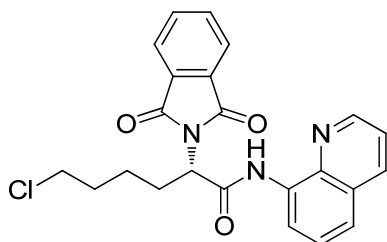

The compound **3i** was prepared according to the **GP-2** under condition (**d**) and purified by column chromatography in petroleum ether: dichloromethane: ethyl acetate = 6:3:1. **3i** was obtained as a colorless oil (55.4 mg, 66%).  $^1\text{H}$  NMR (400 MHz,  $\text{CDCl}_3$ )  $\delta$  10.30 (s, 1H), 8.69 (dd,  $J = 5.2, 3.8$  Hz, 1H), 8.65 (dd,  $J = 4.2, 1.6$  Hz, 1H), 8.10 (dd,  $J = 8.3, 1.4$  Hz, 1H), 7.89 (dd,  $J = 5.5, 3.1$  Hz, 2H), 7.74 (dd,  $J = 5.4, 3.1$  Hz, 2H), 7.52 – 7.45 (m, 2H), 7.38 (dd,  $J = 8.3, 4.2$  Hz, 1H), 5.13 (dd,  $J = 10.8, 5.3$  Hz, 1H), 3.53 (t,  $J = 6.6$  Hz, 2H), 2.68 – 2.54 (m, 1H), 2.48 – 2.37 (m, 1H), 2.00 – 1.80 (m, 2H), 1.68 – 1.49 (m, 2H);  $^{13}\text{C}$  NMR (101 MHz,  $\text{CDCl}_3$ )  $\delta$  168.15, 166.80, 148.43, 138.52, 136.36, 134.41, 133.88, 131.82, 127.91, 127.32, 123.73, 122.07, 121.73, 116.76, 55.03, 44.65, 31.96, 28.07, 24.06; HRMS (EI)  $m/z$ : 421.1191 ( $\text{M}^+$ ); calc. for  $\text{C}_{23}\text{H}_{20}\text{ClN}_3\text{O}_3$ : 421.1193.

**(S)-9-Chloro-2-(1,3-dioxoisoindolin-2-yl)-N-(quinolin-8-yl)nonanamide (3j)**

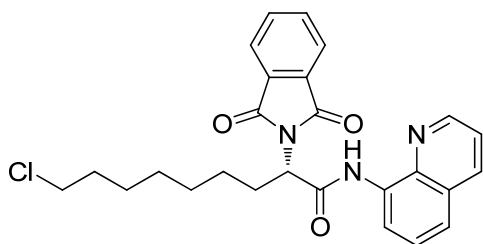

The compound **3j** was prepared according to the **GP-2** under condition (a) and purified by column chromatography in petroleumether: dichloromethane: ethyl acetate = 6:3:1. **3j** was obtained as a colorless oil (78.2 mg, 84%).  $^1\text{H}$  NMR (400 MHz,  $\text{CDCl}_3$ )  $\delta$  10.32 (s, 1H), 8.70 (dd,  $J = 5.3, 3.7$  Hz, 1H), 8.67 – 8.60 (m, 1H), 8.14 – 8.04 (m, 1H), 7.93 – 7.81 (m, 2H), 7.77 – 7.68 (m, 2H), 7.51 – 7.42 (m, 2H), 7.38 (dd,  $J = 4.2, 1.2$  Hz, 1H), 5.12 (dd,  $J = 10.8, 5.3$  Hz, 1H), 3.48 (t,  $J = 6.7$  Hz, 2H), 2.65 – 2.51 (m, 1H), 2.44 – 2.32 (m, 1H), 1.78 – 1.65 (m, 2H), 1.53 – 1.26 (m, 8H);  $^{13}\text{C}$  NMR (101 MHz,  $\text{CDCl}_3$ )  $\delta$  168.17, 167.07, 148.39, 138.49, 136.32, 134.31, 133.93, 131.82, 127.87, 127.28, 123.63, 121.98, 121.68, 116.70, 55.26, 45.11, 32.53, 28.86, 28.70, 28.64, 26.74, 26.57; HRMS (EI)  $m/z$ : 463.1668 ( $\text{M}^+$ ); calc. for  $\text{C}_{26}\text{H}_{26}\text{ClN}_3\text{O}_3$ : 463.1663.

**(S)-2-(1,3-Dioxisoindolin-2-yl)-7-iodo-N-(quinolin-8-yl)heptanamide (3k)**

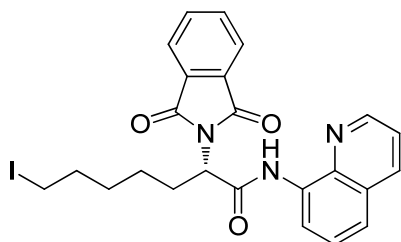

The compound **3k** was prepared according to the **GP-2** under condition (d) and purified by column chromatography in petroleumether: dichloromethane: ethyl acetate = 6:3:1. **3k** was obtained as a colorless oil (39.0 mg, 37%).  $^1\text{H}$  NMR (400 MHz,  $\text{CDCl}_3$ )  $\delta$  10.32 (s, 1H), 8.74 – 8.65 (m, 2H), 8.13 (dd,  $J = 8.3, 1.4$  Hz, 1H), 7.90 (dd,  $J = 5.4, 3.1$  Hz, 2H), 7.76 (dd,  $J = 5.4, 3.1$  Hz, 2H), 7.52 – 7.47 (m, 2H), 7.41 (dd,  $J = 8.3, 4.2$  Hz, 1H), 5.12 (dd,  $J = 10.8, 5.4$  Hz, 1H), 3.16 (t,  $J = 7.0$  Hz, 2H), 2.64 – 2.52 (m, 1H), 2.46 – 2.35 (m, 1H), 1.90 – 1.78 (m, 2H), 1.60 – 1.39 (m, 4H);  $^{13}\text{C}$  NMR (101 MHz,  $\text{CDCl}_3$ )  $\delta$  168.22, 166.96, 148.48, 138.60, 136.41, 134.41, 133.98, 131.91, 127.97, 127.40, 123.77, 122.07, 121.75, 116.83, 55.21, 33.30, 30.03, 28.65, 25.76, 6.75; HRMS (EI)  $m/z$ : 527.0714 ( $\text{M}^+$ ); calc. for  $\text{C}_{24}\text{H}_{22}\text{IN}_3\text{O}_3$ : 527.0706.

**(S)-2-(1,3-Dioxisoindolin-2-yl)-9-iodo-N-(quinolin-8-yl)nonanamide (3l)**

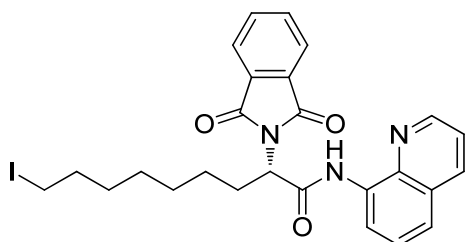

The compound **3l** was prepared according to the **GP-2** under condition (a) and purified by column chromatography in petroleumether: dichloromethane: ethyl acetate = 6:3:1. **3l** was obtained as a colorless oil (48.6 mg, 44%).  $^1\text{H}$  NMR (400 MHz,  $\text{CDCl}_3$ )  $\delta$  10.32 (s, 1H), 8.70 (dd,  $J = 5.2, 3.8$  Hz, 1H), 8.68 (dd,  $J = 4.2, 1.6$  Hz, 1H), 8.12 (dd,  $J = 8.3, 1.4$  Hz, 1H), 7.89 (dd,  $J = 5.4, 3.0$  Hz, 2H), 7.75 (dd,  $J = 5.4, 3.1$  Hz, 2H), 7.53 – 7.46 (m, 2H), 7.40 (dd,  $J = 8.3, 4.2$  Hz, 1H), 5.12 (dd,  $J = 10.8, 5.3$  Hz, 1H), 3.14 (t,  $J = 7.0$  Hz, 2H), 2.65 – 2.52 (m, 1H), 2.45 – 2.33 (m, 1H), 1.82 – 1.74 (m, 2H), 1.50 – 1.29 (m, 8H);  $^{13}\text{C}$  NMR (101 MHz,  $\text{CDCl}_3$ )  $\delta$  168.20, 167.09, 148.43, 138.57, 136.36, 134.34, 134.00, 131.90, 127.93, 127.36, 123.70, 122.00, 121.71, 116.76, 55.30, 33.46, 30.38, 28.85, 28.74, 28.33, 26.61, 7.26; HRMS (EI)  $m/z$ : 555.1028 ( $\text{M}^+$ ); calc. for  $\text{C}_{26}\text{H}_{26}\text{IN}_3\text{O}_3$ : 555.1019.

**(S)-2-(1,3-Dioxisoindolin-2-yl)-6,6,6-trifluoro-N-(quinolin-8-yl)hexanamide (3m)**

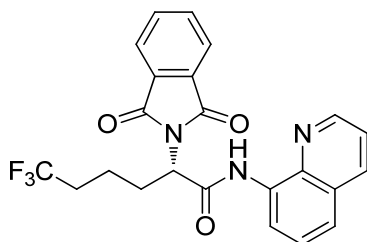

The compound **3m** was prepared according to the **GP-2** under condition (c) and purified by column chromatography in petroleumether: dichloromethane: ethyl acetate = 6:3:1. **3m** was obtained as a colorless oil (47.3 mg, 54%).  $^1\text{H}$  NMR (400 MHz,  $\text{CDCl}_3$ )  $\delta$  10.21 (s, 1H), 8.60 (dd,  $J = 4.9, 4.1$  Hz, 1H), 8.54 (dd,  $J = 4.2, 1.6$  Hz, 1H), 8.03 (dd,  $J = 8.3, 1.7$  Hz, 1H), 7.83 (dd,  $J = 5.4, 3.1$  Hz, 2H), 7.69 (dd,  $J = 5.5, 3.1$  Hz, 2H), 7.45 – 7.38 (m, 2H), 7.31 (dd,  $J = 8.3, 4.3$  Hz, 1H), 5.05 (dd,  $J = 10.6, 5.3$  Hz, 1H), 2.62 – 2.48 (m, 1H), 2.47 – 2.35 (m, 1H), 2.27 – 2.02 (m, 2H), 1.68 – 1.52 (m, 2H);  $^{13}\text{C}$  NMR (101 MHz,  $\text{CDCl}_3$ )  $\delta$  168.11, 166.39, 148.47, 138.54, 136.41, 134.56, 133.81, 131.78, 131.06, 128.31, 127.95, 127.36, 125.57, 123.87, 122.18, 121.78, 116.83, 54.66, 33.76, 33.48, 33.19, 32.90, 27.87, 19.43, 19.40; HRMS (EI)  $m/z$ : 441.1304 ( $\text{M}^+$ ); calc. for  $\text{C}_{23}\text{H}_{18}\text{F}_3\text{N}_3\text{O}_3$ : 441.1300.

**(S)-Benzyl (7-(1,3-dioxisoindolin-2-yl)-8-oxo-8-(quinolin-8-ylamino)octyl)carbamate (3n)**



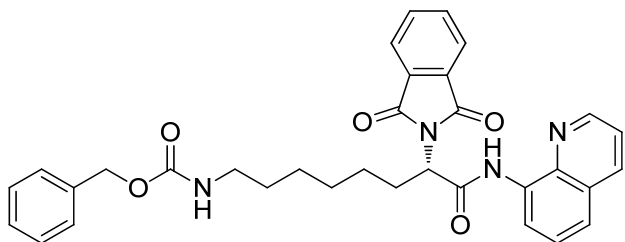

The compound **3n** was prepared according to the **GP-2** under condition (c) and purified by column chromatography in petroleum ether: dichloromethane: ethyl acetate = 3:3:1. **3n** was obtained as a white solid (84.8 mg, 75%).  $^1\text{H}$  NMR (400 MHz,  $\text{CDCl}_3$ )  $\delta$  10.32 (s, 1H), 8.78 – 8.61 (m, 2H), 8.14 – 8.06 (m, 1H), 7.88 (dd,  $J = 4.6, 3.1$  Hz, 2H), 7.72 (dd,  $J = 5.0, 3.1$  Hz, 2H), 7.51 – 7.44 (m, 2H), 7.37 (dd,  $J = 8.3, 4.2$  Hz, 1H), 7.35 – 7.23 (m, 5H), 5.24 – 4.79 (m, 4H), 3.15 (dd,  $J = 12.9, 6.4$  Hz, 2H), 2.65 – 2.48 (m, 1H), 2.44 – 2.28 (m, 1H), 1.51 – 1.23 (m, 8H);  $^{13}\text{C}$  NMR (101 MHz,  $\text{CDCl}_3$ )  $\delta$  168.15, 167.03, 156.45, 148.37, 138.46, 136.71, 136.29, 134.28, 133.89, 131.77, 128.47, 128.03, 128.01, 127.84, 127.25, 123.61, 121.97, 121.65, 116.68, 66.48, 55.17, 40.95, 29.79, 28.62, 26.54, 26.48; HRMS (EI)  $m/z$ : 564.2373 ( $\text{M}^+$ ); calc. for  $\text{C}_{33}\text{H}_{32}\text{N}_4\text{O}_5$ : 564.2373.

**(S)-Methyl 7-(1,3-dioxoisindolin-2-yl)-8-oxo-8-(quinolin-8-ylamino)octanoate (3o)**

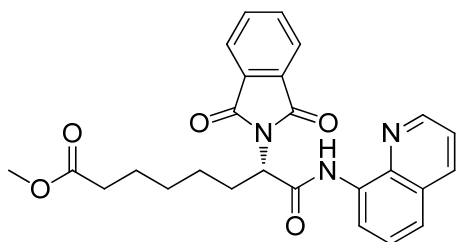

The compound **3o** was prepared according to the **GP-2** under condition (c) and purified by column chromatography in petroleum ether: dichloromethane: ethyl acetate = 4:3:1. **3o** was obtained as a colorless oil (53.1 mg, 58%).  $^1\text{H}$  NMR (400 MHz,  $\text{CDCl}_3$ )  $\delta$  10.30 (s, 1H), 8.73 – 8.62 (m, 2H), 8.09 (dd,  $J = 8.3, 1.2$  Hz, 1H), 7.87 (dd,  $J = 5.4, 3.2$  Hz, 2H), 7.73 (dd,  $J = 5.4, 3.2$  Hz, 2H), 7.51 – 7.44 (m, 2H), 7.38 (dd,  $J = 8.2, 4.2$  Hz, 1H), 5.11 (dd,  $J = 10.8, 5.3$  Hz, 1H), 3.62 (s, 3H), 2.64 – 2.50 (m, 1H), 2.45 – 2.33 (m, 1H), 2.28 (t,  $J = 7.4$  Hz, 2H), 1.71 – 1.56 (m, 2H), 1.52 – 1.34 (m, 4H);  $^{13}\text{C}$  NMR (101 MHz,  $\text{CDCl}_3$ )  $\delta$  174.05, 168.15, 166.98, 148.40, 138.50, 136.32, 134.32, 133.93, 131.83, 127.88, 127.29, 123.66, 121.98, 121.68, 116.71, 55.16, 51.52, 33.93, 28.61, 28.58, 26.41, 24.76; HRMS (EI)  $m/z$ : 459.1802 ( $\text{M}^+$ ); calc. for  $\text{C}_{26}\text{H}_{25}\text{N}_3\text{O}_5$ : 459.1794.

**(S,Z)-2-(1,3-Dioxoisindolin-2-yl)-N-(quinolin-8-yl)non-6-enamide (3p)**

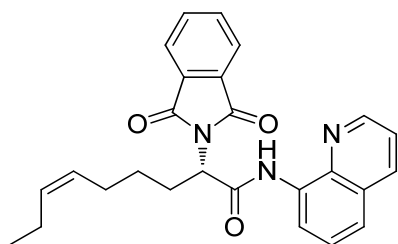

The compound **3p** was prepared according to the **GP-2** under condition (c) and purified by column chromatography in petroleumether: dichloromethane: ethyl acetate = 6:3:1. **3p** was obtained as a colorless oil (21.3 mg, 25%).  $^1\text{H}$  NMR (400 MHz,  $\text{CDCl}_3$ )  $\delta$  10.34 (s, 1H), 8.77 – 8.64 (m, 2H), 8.13 (dd,  $J = 8.3, 1.6$  Hz, 1H), 7.90 (dd,  $J = 5.4, 3.1$  Hz, 2H), 7.75 (dd,  $J = 5.5, 3.1$  Hz, 2H), 7.53 – 7.48 (m, 2H), 7.41 (dd,  $J = 8.3, 4.2$  Hz, 1H), 5.47 – 5.36 (m, 1H), 5.36 – 5.25 (m, 1H), 5.13 (dd,  $J = 11.0, 5.3$  Hz, 1H), 2.67 – 2.52 (m, 1H), 2.47 – 2.35 (m, 1H), 2.25 – 2.10 (m, 2H), 2.10 – 2.00 (m, 2H), 1.57 – 1.42 (m, 2H), 0.94 (t,  $J = 7.5$  Hz, 3H);  $^{13}\text{C}$  NMR (101 MHz,  $\text{CDCl}_3$ )  $\delta$  168.25, 167.13, 148.45, 138.66, 136.41, 134.36, 134.08, 132.80, 131.98, 128.08, 127.99, 127.44, 123.74, 122.03, 121.75, 116.84, 55.24, 28.33, 26.77, 26.51, 20.71, 14.47; HRMS (EI)  $m/z$ : 427.1898 ( $\text{M}^+$ ); calc. for  $\text{C}_{26}\text{H}_{25}\text{N}_3\text{O}_3$ : 427.1896.

**(S,E)-2-(1,3-Dioxisoindolin-2-yl)-N-(quinolin-8-yl)non-7-enamide (3p)**

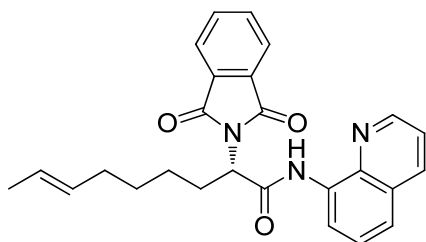

The compound **3q** was prepared according to the **GP-2** under condition (c) and purified by column chromatography in petroleumether: dichloromethane: ethyl acetate = 6:3:1. **3q** was obtained as a colorless oil (25.8 mg, 30%).  $^1\text{H}$  NMR (400 MHz,  $\text{CDCl}_3$ )  $\delta$  10.33 (s, 1H), 8.71 (dd,  $J = 5.4, 3.7$  Hz, 1H), 8.69 (dd,  $J = 4.3, 1.7$  Hz, 1H), 8.12 (dd,  $J = 8.3, 1.6$  Hz, 1H), 7.90 (dd,  $J = 5.4, 3.1$  Hz, 2H), 7.75 (dd,  $J = 5.5, 3.1$  Hz, 2H), 7.53 – 7.46 (m, 2H), 7.40 (dd,  $J = 8.3, 4.2$  Hz, 1H), 5.48 – 5.25 (m, 2H), 5.12 (dd,  $J = 10.9, 5.3$  Hz, 1H), 2.58 (tdd,  $J = 9.2, 7.0, 3.0$  Hz, 1H), 2.39 (tdd,  $J = 14.0, 10.4, 3.9$  Hz, 1H), 2.08 – 1.91 (m, 2H), 1.61 – 1.54 (m, 3H), 1.53 – 1.36 (m, 4H);  $^{13}\text{C}$  NMR (101 MHz,  $\text{CDCl}_3$ )  $\delta$  168.23, 167.18, 148.44, 138.62, 136.38, 134.32, 134.05, 131.95, 131.02, 127.96, 127.40, 125.30, 123.70, 122.00, 121.73, 116.80, 55.35, 32.31, 28.94, 28.65, 26.14, 17.96; HRMS (EI)  $m/z$ : 427.1893 ( $\text{M}^+$ ); calc. for  $\text{C}_{26}\text{H}_{25}\text{N}_3\text{O}_3$ : 427.1896.

**(S,Z)-2-(1,3-Dioxisoindolin-2-yl)-N-(quinolin-8-yl)henicos-12-enamide (3r)**

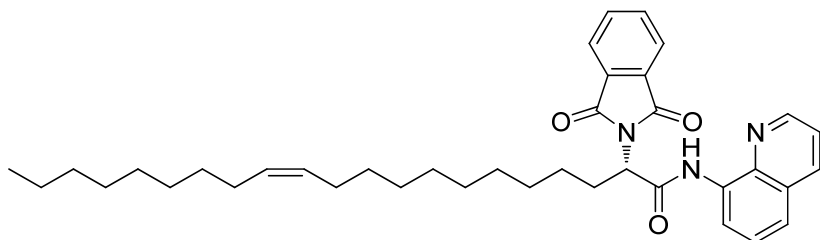

The compound **3r** was prepared according to the **GP-2** under condition (**d**) and purified by column chromatography in petroleumether: dichloromethane: ethyl acetate = 6:3:1. **3r** was obtained as a white solid (79.6 mg, 67%).  $^1\text{H}$  NMR (400 MHz,  $\text{CDCl}_3$ )  $\delta$  10.33 (s, 1H), 8.71 (dd,  $J = 5.7, 3.3$  Hz, 1H), 8.67 (dd,  $J = 4.1, 1.2$  Hz, 1H), 8.10 (dd,  $J = 8.3, 1.1$  Hz, 1H), 7.88 (dd,  $J = 5.4, 3.1$  Hz, 2H), 7.72 (dd,  $J = 5.4, 3.1$  Hz, 2H), 7.51 – 7.44 (m, 2H), 7.38 (dd,  $J = 8.3, 4.2$  Hz, 1H), 5.58 – 5.22 (m, 2H), 5.13 (dd,  $J = 10.9, 5.3$  Hz, 1H), 2.68 – 2.49 (m, 1H), 2.47 – 2.32 (m, 1H), 2.09 – 1.87 (m, 4H), 1.50 – 1.37 (m, 4H), 1.33 – 1.22 (m, 22H), 0.86 (t,  $J = 6.8$  Hz, 3H);  $^{13}\text{C}$  NMR (101 MHz,  $\text{CDCl}_3$ )  $\delta$  168.12, 167.11, 148.32, 138.49, 136.26, 134.20, 133.96, 131.85, 129.90, 129.86, 127.85, 127.27, 123.57, 121.89, 121.61, 116.68, 55.31, 32.62, 31.91, 29.77, 29.71, 29.66, 29.61, 29.53, 29.51, 29.50, 29.43, 29.32, 29.29, 29.06, 28.76, 27.59, 27.22, 26.71, 22.69, 14.13; HRMS (EI)  $m/z$ : 595.3771 ( $\text{M}^+$ ); calc. for  $\text{C}_{38}\text{H}_{49}\text{N}_3\text{O}_3$ : 595.3774.

**(S)-2-(1,3-Dioxisoindolin-2-yl)-N-(quinolin-8-yl)undecanamide (3s)**

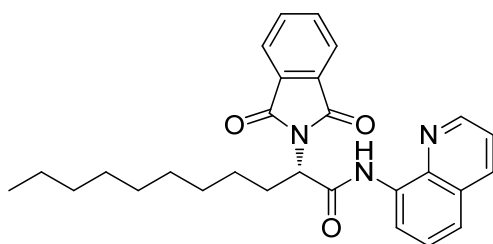

The compound **3s** was prepared according to the **GP-2** under condition (**f**) and purified by column chromatography in petroleumether: dichloromethane: ethyl acetate = 6:3:1. **3-s** was obtained as a colorless oil (57.5 mg, 63%).  $^1\text{H}$  NMR (400 MHz,  $\text{CDCl}_3$ )  $\delta$  10.33 (s, 1H), 8.71 (dd,  $J = 5.5, 3.5$  Hz, 1H), 8.67 (d,  $J = 4.0$  Hz, 1H), 8.10 (d,  $J = 8.2$  Hz, 1H), 7.88 (dd,  $J = 5.3, 3.1$  Hz, 2H), 7.73 (dd,  $J = 5.3, 3.2$  Hz, 2H), 7.53 – 7.44 (m, 2H), 7.39 (dd,  $J = 8.2, 4.2$  Hz, 1H), 5.13 (dd,  $J = 10.9, 5.3$  Hz, 1H), 2.67 – 2.51 (m, 1H), 2.45 – 2.33 (m, 1H), 1.50 – 1.35 (m, 4H), 1.31 – 1.17 (m, 10H), 0.85 (t,  $J = 6.8$  Hz, 3H);  $^{13}\text{C}$  NMR (101 MHz,  $\text{CDCl}_3$ )  $\delta$  168.21, 167.19, 148.40, 138.56, 136.34, 134.28, 134.02, 131.91, 127.92, 127.34, 123.65, 121.96, 121.69, 116.75, 55.38, 31.90, 29.53, 29.48, 29.31, 29.11, 28.82, 26.76, 22.72, 14.18; HRMS (EI)  $m/z$ : 457.2356 ( $\text{M}^+$ ); calc. for  $\text{C}_{28}\text{H}_{31}\text{N}_3\text{O}_3$ : 457.2365.

**(S)-2-(1,3-Dioxisoindolin-2-yl)-N-(quinolin-8-yl)hept-6-enamide (3t)**

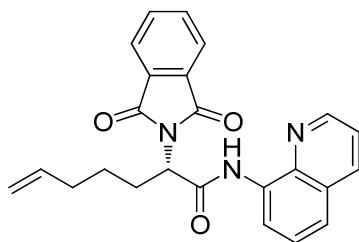

The compound **3t** was prepared according to the **GP-2** under condition (**f**) and purified by column chromatography in petroleumether: dichloromethane: ethyl acetate = 6:3:1. **3t** was obtained as a colorless oil (12.8 mg, 16%).  $^1\text{H}$  NMR (400 MHz,  $\text{CDCl}_3$ )  $\delta$  10.33 (s, 1H), 8.77 – 8.64 (m, 2H), 8.13 (dd,  $J = 8.3, 1.7$  Hz, 1H), 7.90 (dd,  $J = 5.5, 3.1$  Hz, 2H), 7.76 (dd,  $J = 5.5, 3.1$  Hz, 2H), 7.54 – 7.47 (m, 2H), 7.41 (dd,  $J = 8.3, 4.2$  Hz, 1H), 5.81 (ddt,  $J = 16.9, 10.2, 6.7$  Hz, 1H), 5.13 (dd,  $J = 10.9, 5.3$  Hz, 1H), 5.06 (ddd,  $J = 17.1, 3.3, 1.6$  Hz, 1H), 5.01 – 4.94 (m, 1H), 2.60 (tdd,  $J = 10.7, 10.2, 5.5$  Hz, 1H), 2.48 – 2.37 (m, 1H), 2.28 – 2.10 (m, 2H), 1.61 – 1.46 (m, 2H).  $^{13}\text{C}$  NMR (101 MHz,  $\text{CDCl}_3$ )  $\delta$  168.25, 167.08, 148.47, 138.65, 137.98, 136.41, 134.38, 134.06, 131.97, 127.99, 127.44, 123.77, 122.04, 121.76, 116.84, 115.45, 55.21, 33.18, 28.29, 26.00; HRMS (EI)  $m/z$ : 399.1577 ( $\text{M}^+$ ); calc. for  $\text{C}_{24}\text{H}_{21}\text{N}_3\text{O}_3$ : 399.1583.

**(S)-2-(1,3-Dioxoisindolin-2-yl)-5-(1,3-dioxolan-2-yl)-N-(quinolin-8-yl)pentanamide (3u)**

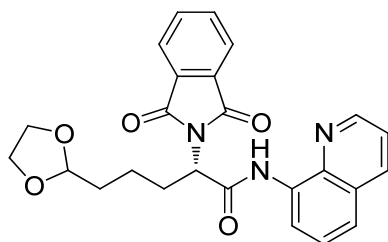

The compound **3u** was prepared according to the **GP-2** under condition (**f**) and purified by column chromatography in petroleumether: dichloromethane: ethyl acetate = 3:3:1. **3u** was obtained as a white solid (48.0 mg, 54%).  $^1\text{H}$  NMR (400 MHz,  $\text{CDCl}_3$ )  $\delta$  10.30 (s, 1H), 8.69 (dd,  $J = 4.9, 4.1$  Hz, 1H), 8.67 (dd,  $J = 4.2, 1.6$  Hz, 1H), 8.11 (dd,  $J = 8.3, 1.6$  Hz, 1H), 7.88 (dd,  $J = 5.5, 3.0$  Hz, 2H), 7.74 (dd,  $J = 5.4, 3.1$  Hz, 2H), 7.52 – 7.45 (m, 2H), 7.39 (dd,  $J = 8.3, 4.2$  Hz, 1H), 5.16 (dd,  $J = 11.1, 5.0$  Hz, 1H), 4.87 (t,  $J = 4.6$  Hz, 1H), 3.99 – 3.88 (m, 2H), 3.87 – 3.78 (m, 2H), 2.68 (ddt,  $J = 14.6, 11.2, 7.5$  Hz, 1H), 2.53 – 2.37 (m, 1H), 1.88 – 1.72 (m, 2H), 1.64 – 1.50 (m, 2H);  $^{13}\text{C}$  NMR (101 MHz,  $\text{CDCl}_3$ )  $\delta$  168.21, 167.05, 148.39, 138.57, 136.36, 134.31, 134.02, 131.94, 127.93, 127.36, 123.69, 121.99, 121.71, 116.79, 104.27, 65.01, 64.91, 55.14, 32.99, 28.60, 21.17; HRMS (EI)  $m/z$ : 445.1636 ( $\text{M}^+$ ); calc. for  $\text{C}_{25}\text{H}_{23}\text{N}_3\text{O}_5$ : 445.1638.

**(S)-Methyl 4-(1,3-dioxoisindolin-2-yl)-5-oxo-5-(quinolin-8-ylamino)pentanoate (3v)**

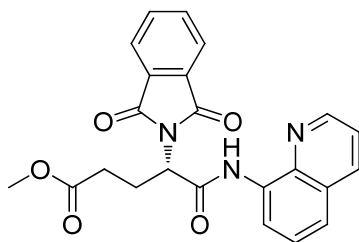

The compound **3v** was prepared according to the **GP-2** under condition (**e**) and purified by column chromatography in petroleumether: dichloromethane: ethyl acetate = 3:3:1. **3v** was obtained as a white solid (65.8 mg, 79%).  $^1\text{H}$  NMR (400 MHz,  $\text{CDCl}_3$ )  $\delta$  10.32 (s, 1H), 8.81 – 8.55 (m, 2H), 8.13 (d,  $J$  = 8.2 Hz, 1H), 7.91 (dd,  $J$  = 5.3, 3.1 Hz, 2H), 7.77 (dd,  $J$  = 5.3, 3.1 Hz, 2H), 7.53 – 7.47 (m, 2H), 7.41 (dd,  $J$  = 8.3, 4.2 Hz, 1H), 5.21 (dd,  $J$  = 8.9, 6.8 Hz, 1H), 3.67 (s, 3H), 2.90 – 2.76 (m, 2H), 2.59 – 2.43 (m, 2H);  $^{13}\text{C}$  NMR (101 MHz,  $\text{CDCl}_3$ )  $\delta$  172.68, 167.97, 166.29, 148.37, 138.39, 136.25, 134.37, 133.77, 131.72, 131.71, 127.80, 127.18, 123.65, 122.03, 121.67, 116.67, 54.15, 51.86, 30.93, 24.14; HRMS (EI)  $m/z$ : 417.1318 ( $\text{M}^+$ ); calc. for  $\text{C}_{23}\text{H}_{19}\text{N}_3\text{O}_5$ : 417.1325.

**(S)-Ethyl 4-(1,3-dioxoisindolin-2-yl)-5-oxo-5-(quinolin-8-ylamino)pentanoate (3w)**

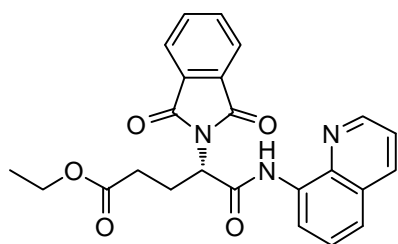

The compound **3w** was prepared according to the **GP-2** under condition (**e**), (**h**) and purified by column chromatography in petroleumether: dichloromethane: ethyl acetate = 3:3:1. **3w** was obtained as a white solid (67.2 mg, 78%) under condition (**e**). Mono- and di-alkylated products were obtained as a mixture under condition (**h**) (71.2 mg, 83%, mono:di = 4.5:1).  $^1\text{H}$  NMR (400 MHz,  $\text{CDCl}_3$ )  $\delta$  10.32 (s, 1H), 8.81 – 8.55 (m, 2H), 8.13 (d,  $J$  = 8.2 Hz, 1H), 7.91 (dd,  $J$  = 5.3, 3.1 Hz, 2H), 7.77 (dd,  $J$  = 5.3, 3.1 Hz, 2H), 7.53 – 7.47 (m, 2H), 7.41 (dd,  $J$  = 8.3, 4.2 Hz, 1H), 5.21 (dd,  $J$  = 8.9, 6.8 Hz, 1H), 3.67 (s, 3H), 2.90 – 2.76 (m, 2H), 2.59 – 2.43 (m, 2H);  $^{13}\text{C}$  NMR (101 MHz,  $\text{CDCl}_3$ )  $\delta$  172.68, 167.97, 166.29, 148.37, 138.39, 136.25, 134.37, 133.77, 131.72, 131.71, 127.80, 127.18, 123.65, 122.03, 121.67, 116.67, 54.15, 51.86, 30.93, 24.14; HRMS (EI)  $m/z$ : 431.1483 ( $\text{M}^+$ ); calc. for  $\text{C}_{24}\text{H}_{21}\text{N}_3\text{O}_5$ : 431.1481.

### General Procedure (GP-3) for Alkylation of Secondary C(sp<sup>3</sup>)-H Bonds

To a 30- mL resealable Schlenk flask was added 8-aminoquinoline amide (**1**) (0.2 mmol, overall concentration = 0.133 mol/L), Pd(OAc)<sub>2</sub> (4.5 mg, 0.02 mmol),  $\alpha$ -bromoacetate esters or  $\alpha$ -iodoacetate esters (**2'**) (0.3 mmol), Ag<sub>2</sub>CO<sub>3</sub> (0.16 mmol), (BnO)<sub>2</sub>POOH (0.06 mmol), DCE/*t*-BuOH (1.5 mL). The flask was then charged with N<sub>2</sub>. The mixture was stirred at 90°C for 9 to 12 hours under N<sub>2</sub>. After cooling to room temperature, the reaction was diluted with dichloromethane (5 mL) and then filtered through a pad of Celite and washed by dichloromethane (30 mL). Evaporation of organic solvent and purification by column chromatography gave the corresponding products.

(a)**1** (0.2mmol, 1.0eq),  $\alpha$ -bromoacetate esters (1.5eq), Pd(OAc)<sub>2</sub> (10 mol%), Ag<sub>2</sub>CO<sub>3</sub> (0.8eq), (BnO)<sub>2</sub>POOH (0.3eq), DCE/*t*-BuOH = 1:2, 90°C, 12h;

(b)**1** (0.2mmol, 1.0eq), methyl bromoacetate (1.5eq), Pd(OAc)<sub>2</sub> (10 mol%), Ag<sub>2</sub>CO<sub>3</sub> (0.8eq), (BnO)<sub>2</sub>POOH (0.3eq), DCE/*t*-BuOH = 1:2, 90°C, 9h;

(c)**1** (0.2mmol, 1.0eq),  $\alpha$ -iodoacetate esters (1.5eq), Pd(OAc)<sub>2</sub> (10 mol%), Ag<sub>2</sub>CO<sub>3</sub> (0.8eq), (BnO)<sub>2</sub>POOH (0.3eq), DCE/*t*-BuOH = 1:2, 90°C, 9h;

(d)**1** (0.2mmol, 1.0eq),  $\alpha$ -iodoacetate esters (1.5eq), Pd(OAc)<sub>2</sub> (10 mol%), Ag<sub>2</sub>CO<sub>3</sub> (0.8eq), (BnO)<sub>2</sub>POOH (0.3eq), DCE/*t*-BuOH = 2:1, 90°C, 9h.

### (3*R*,4*S*)-Ethyl4-(1,3-dioxoisindolin-2-yl)-3-ethyl-5-oxo-5-(quinolin-8-ylamino)pentanoate (**5a**)

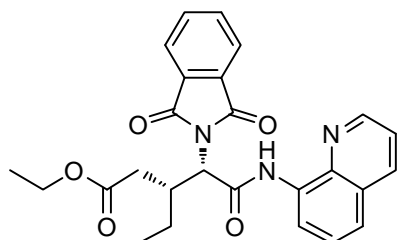

The compound **5a** was prepared according to the **GP-3** under condition (a) and (c) and purified by column chromatography in petroleum ether: dichloromethane: ethyl acetate = 5:4:1. **5a** was obtained as colorless oil (75.5 mg, 84%) under condition (a); (50.5mg, 56%) under condition (c) with diastereoselectivity(d.r.) > 50:1 estimated by <sup>1</sup>H NMR. <sup>1</sup>H NMR (400 MHz, CDCl<sub>3</sub>)  $\delta$  10.47 (s, 1H), 8.78 – 8.63 (m, 2H), 8.09 (dd, *J* = 8.3, 1.6 Hz, 1H), 7.86 (dd, *J* = 5.5, 3.0 Hz, 2H), 7.71 (dd, *J* = 5.5, 3.0 Hz, 2H), 7.51 – 7.43 (m, 2H), 7.38 (dd, *J* = 8.3, 4.2 Hz, 1H), 5.27 (d, *J* = 9.8 Hz, 1H), 4.13 (qd, *J* = 7.1, 1.3 Hz, 2H), 3.48 – 3.30 (m, 1H), 2.67 (qd, *J* = 16.2, 5.9 Hz, 2H), 1.67 (dq, *J* = 15.0, 7.5, 3.8 Hz, 1H), 1.45 – 1.32 (m, 1H), 1.23 (t, *J* = 7.1 Hz, 3H), 0.95 (t, *J* = 7.5 Hz, 3H); <sup>13</sup>C NMR (101 MHz, CDCl<sub>3</sub>)  $\delta$  172.11, 168.15, 166.53, 148.48, 138.64, 136.21, 134.38, 134.13, 131.65, 127.90, 127.21, 123.71, 122.11, 121.69, 117.00, 60.64, 58.30, 35.37, 34.88, 23.25, 14.22, 10.51; HRMS (EI) *m/z*: 459.1796 (M<sup>+</sup>); calc. for C<sub>26</sub>H<sub>25</sub>N<sub>3</sub>O<sub>5</sub>: 459.1794.

### (3*R*,4*S*)-Methyl4-(1,3-dioxoisindolin-2-yl)-3-ethyl-5-oxo-5-(quinolin-8-ylamino)pentanoate (**5b**)

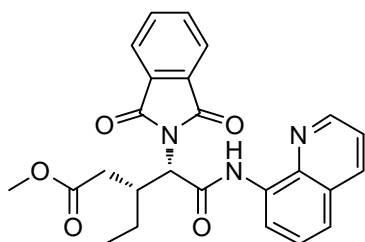

The compound **5b** was prepared according to the **GP-3** under condition (**b**) and purified by column chromatography in petroleum ether: dichloromethane: ethyl acetate = 5:4:1. **5b** was obtained as colorless oil (77.5 mg, 87%) under condition (**b**) with diastereoselectivity(d.r.) > 50:1 estimated by  $^1\text{H}$  NMR.  $^1\text{H}$  NMR (400 MHz,  $\text{CDCl}_3$ )  $\delta$  10.46 (s, 1H), 8.74 – 8.68 (m, 2H), 8.09 (dd,  $J = 8.3, 1.6$  Hz, 1H), 7.86 (dd,  $J = 5.5, 3.0$  Hz, 2H), 7.71 (dd,  $J = 5.5, 3.0$  Hz, 2H), 7.47 (d,  $J = 4.4$  Hz, 2H), 7.38 (dd,  $J = 8.3, 4.2$  Hz, 1H), 5.23 (d,  $J = 9.7$  Hz, 1H), 3.66 (s, 3H), 3.45 – 3.34 (m, 1H), 2.67 (qd,  $J = 16.3, 6.0$  Hz, 2H), 1.68 (ddd,  $J = 14.2, 7.5, 3.8$  Hz, 1H), 1.37 (dt,  $J = 14.4, 7.4$  Hz, 1H), 0.94 (t,  $J = 7.5$  Hz, 3H);  $^{13}\text{C}$  NMR (101 MHz,  $\text{CDCl}_3$ )  $\delta$  172.60, 168.15, 166.49, 148.50, 138.64, 136.23, 134.41, 134.11, 131.65, 127.91, 127.23, 123.75, 122.14, 121.70, 117.03, 58.27, 51.77, 35.39, 34.71, 23.30, 10.46; HRMS (EI)  $m/z$ : 445.1647 ( $\text{M}^+$ ); calc. for  $\text{C}_{25}\text{H}_{23}\text{N}_3\text{O}_5$ : 445.1638.

**(3S,4S)-Ethyl 4-(1,3-dioxoisoindolin-2-yl)-5-oxo-3-phenyl-5-(quinolin-8-ylamino)pentanoate (5c)**

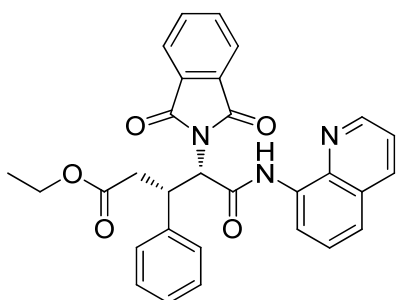

The compound **5c** was prepared according to the **GP-3** under condition (**a**), (**c**) and purified by column chromatography in petroleum ether: dichloromethane: ethyl acetate = 5:4:1. **5c** was obtained as colorless oil (46.6 mg, 46%) under condition (**a**); (86.0mg, 85%) under condition (**c**) with diastereoselectivity(d.r.) > 50:1 estimated by  $^1\text{H}$  NMR.  $^1\text{H}$  NMR (400 MHz,  $\text{CDCl}_3$ )  $\delta$  10.65 (s, 1H), 8.82 – 8.71 (m, 2H), 8.12 (dd,  $J = 8.3, 1.6$  Hz, 1H), 7.70 (dd,  $J = 5.5, 3.0$  Hz, 2H), 7.60 (dd,  $J = 5.5, 3.1$  Hz, 2H), 7.55 – 7.49 (m, 2H), 7.41 (dd,  $J = 8.3, 4.2$  Hz, 1H), 7.31 – 7.25 (m, 2H), 7.14 (t,  $J = 7.6$  Hz, 2H), 7.04 (t,  $J = 7.4$  Hz, 1H), 5.42 (d,  $J = 11.8$  Hz, 1H), 4.76 (ddd,  $J = 11.6, 10.4, 4.1$  Hz, 1H), 4.03 – 3.88 (m, 2H), 3.19 (dd,  $J = 15.5, 4.1$  Hz, 1H), 2.88 (dd,  $J = 15.5, 10.3$  Hz, 1H), 1.06 (t,  $J = 7.1$  Hz, 3H);  $^{13}\text{C}$  NMR (101 MHz,  $\text{CDCl}_3$ )  $\delta$  171.03, 167.65, 166.25, 148.66, 139.00, 138.73, 136.26, 134.21, 131.24, 128.49, 128.31, 127.96, 127.42, 127.26, 123.51, 122.34, 121.76, 117.23, 60.57, 59.24, 40.91, 39.50, 14.08; HRMS (EI)  $m/z$ : 507.1793 ( $\text{M}^+$ ); calc. for  $\text{C}_{30}\text{H}_{25}\text{N}_3\text{O}_5$ : 507.1794.

**(3*S*,4*S*)-tert-Butyl 4-(1,3-dioxoisindolin-2-yl)-5-oxo-3-phenyl-5-(quinolin-8-ylamino)pentanoate (5d)**

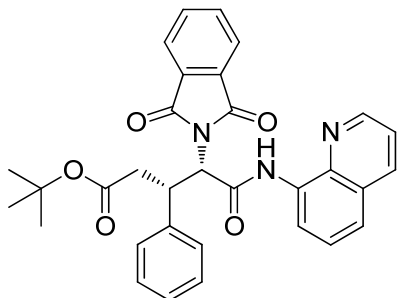

The compound **5d** was prepared according to the **GP-3** under condition (c) and purified by column chromatography in petroleum ether: dichloromethane: ethyl acetate = 5:4:1. **5d** was obtained as colorless oil (95.5 mg, 89%) under condition (c) with diastereoselectivity (d.r.) > 50:1 estimated by <sup>1</sup>H NMR. <sup>1</sup>H NMR (400 MHz, CDCl<sub>3</sub>) δ 10.66 (s, 1H), 8.82 – 8.71 (m, 2H), 8.15 – 8.04 (m, 1H), 7.72 – 7.66 (m, 2H), 7.61 – 7.54 (m, 2H), 7.52 – 7.45 (m, 2H), 7.42 – 7.35 (m, 1H), 7.34 – 7.27 (m, 2H), 7.14 (t, *J* = 7.5 Hz, 2H), 7.03 (dd, *J* = 7.1 Hz, 1H), 5.42 (dd, *J* = 11.7, 2.0 Hz, 1H), 4.70 (td, *J* = 11.0, 4.3 Hz, 1H), 3.14 (dd, *J* = 15.1, 4.4 Hz, 1H), 2.81 (dd, *J* = 15.0, 10.5 Hz, 1H), 1.22 (s, 9H); <sup>13</sup>C NMR (101 MHz, CDCl<sub>3</sub>) δ 170.12, 167.60, 166.22, 148.54, 138.93, 138.64, 136.15, 134.14, 134.10, 131.16, 128.34, 128.28, 127.86, 127.26, 127.13, 123.37, 122.23, 121.66, 117.13, 80.67, 59.46, 41.05, 40.46, 27.80; HRMS (EI) *m/z*: 535.2114 (M<sup>+</sup>); calc. for C<sub>32</sub>H<sub>29</sub>N<sub>3</sub>O<sub>5</sub>: 535.2107.

**(3*S*,4*S*)-Benzyl 4-(1,3-dioxoisindolin-2-yl)-5-oxo-3-phenyl-5-(quinolin-8-ylamino)pentanoate (5e)**

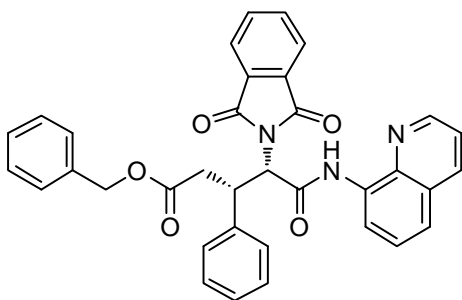

The compound **5e** was prepared according to the **GP-3** under condition (c) and purified by column chromatography in petroleum ether: dichloromethane: ethyl acetate = 5:4:1. **5e** was obtained as colorless oil (113.9 mg, 91%) under condition (c) with diastereoselectivity (d.r.) > 50:1 estimated by <sup>1</sup>H NMR. <sup>1</sup>H NMR (400 MHz, CDCl<sub>3</sub>) δ 10.64 (s, 1H), 8.77 (dd, *J* = 5.5, 3.4 Hz, 1H), 8.71 (dd, *J* = 4.2, 1.5 Hz, 1H), 8.08 (dd, *J* = 8.3, 1.4 Hz, 1H), 7.68 (dd, *J* = 5.4, 3.0 Hz, 2H), 7.57 (dd, *J* = 5.4, 3.1 Hz, 2H), 7.49 (d, *J* = 2.1 Hz, 1H), 7.48 (s, 1H), 7.37 (dd, *J* = 8.3, 4.2 Hz, 1H), 7.28 – 7.21 (m, 5H), 7.14 – 7.08 (m, 4H), 7.03 (t, *J* = 7.3 Hz, 1H), 5.42 (d, *J* = 11.7 Hz, 1H), 4.94 (d, *J* = 2.4 Hz, 2H), 4.79 (td, *J* = 10.9, 4.1 Hz, 1H), 3.28 (dd, *J* = 15.5, 4.1 Hz, 1H), 2.96 (dd, *J* = 15.5, 10.3 Hz, 1H). <sup>13</sup>C NMR (101 MHz, CDCl<sub>3</sub>) δ 170.88, 167.59, 166.17, 148.61, 138.86, 138.67, 136.21, 135.71, 134.18, 134.13, 131.18, 128.52, 128.44, 128.28,



128.16, 128.06, 127.91, 127.42, 127.21, 123.46, 122.32, 121.72, 117.19, 66.35, 59.17, 40.91, 39.44;  
HRMS (EI)  $m/z$ : 569.1937 ( $M^+$ ); calc.for  $C_{35}H_{27}N_3O_5$ : 569.1951; (ESI) $m/z$ : 592.1826; calc.for  
 $C_{35}H_{27}N_3O_5Na$ : 592.1843.

**(3*R*,4*S*)-Ethyl4-(1,3-dioxisoindolin-2-yl)-3-(2-(1,3-dioxisoindolin-2-yl)ethyl)-5-oxo-5-(quinolin-8-ylamino)pentanoate (5f)**

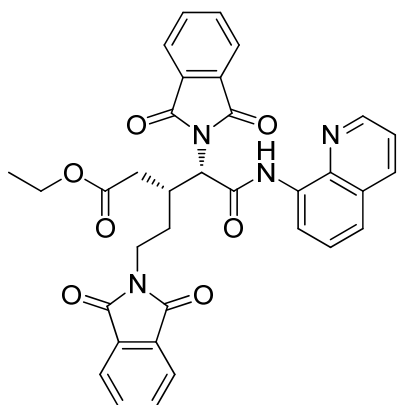

The compound **5f** was prepared according to the **GP-3** under condition (a), (c) and purified by column chromatography in petroleumether: dichloromethane: ethyl acetate = 2:2:1. **5f** was obtained as white solid (83.5 mg, 69%) under condition (a); (60.4mg, 50%) under condition (c) with diastereoselectivity(d.r.) > 50:1 estimated by  $^1H$  NMR.  $^1H$  NMR (400 MHz,  $CDCl_3$ )  $\delta$  10.35 (s, 1H), 8.75 – 8.57 (m, 2H), 8.07 (dd,  $J$  = 8.2, 1.4 Hz, 1H), 7.81 (dd,  $J$  = 5.5, 3.0 Hz, 2H), 7.74 (dd,  $J$  = 5.4, 3.1 Hz, 2H), 7.70 (dd,  $J$  = 5.5, 3.1 Hz, 2H), 7.64 (dd,  $J$  = 5.4, 3.1 Hz, 2H), 7.47 – 7.41 (m, 2H), 7.36 (dd,  $J$  = 8.3, 4.2 Hz, 1H), 5.38 (d,  $J$  = 9.7 Hz, 1H), 4.22 – 4.13 (m, 2H), 3.93 – 3.82 (m, 1H), 3.76 – 3.61 (m, 1H), 3.54 – 3.37 (m, 1H), 2.91 (dd,  $J$  = 16.6, 5.6 Hz, 1H), 2.79 (dd,  $J$  = 16.6, 5.3 Hz, 1H), 2.13 – 2.03 (m, 1H), 1.82 – 1.70 (m, 1H), 1.25 (t,  $J$  = 7.1 Hz, 3H);  $^{13}C$  NMR (101 MHz,  $CDCl_3$ )  $\delta$  171.87, 168.29, 168.11, 166.15, 148.43, 138.56, 136.18, 134.34, 133.95, 133.82, 132.20, 131.67, 127.85, 127.19, 123.68, 123.16, 122.14, 121.66, 117.02, 60.88, 57.92, 35.25, 34.66, 31.79, 28.97, 14.22; HRMS (ESI)  $m/z$ : 627.1829 ( $MNa^+$ ); calc.for  $C_{34}H_{28}N_4O_7Na$ : 627.1850 (calc.for  $C_{34}H_{28}N_4O_7$ : 604.1958).

**(*R*)-Ethyl6-(1,3-dioxisoindolin-2-yl)-3-((*S*)-1-(1,3-dioxisoindolin-2-yl)-2-oxo-2-(quinolin-8-ylamino)ethyl)hexanoate (5g)**

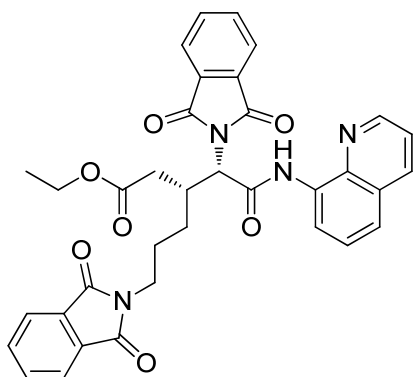

The compound **5g** was prepared according to the **GP-3** under condition (a), (c) and purified by column chromatography in petroleumether: dichloromethane: ethyl acetate = 2:2:1. **5g** was obtained as white solid (96.4 mg, 78%) under condition (a); (70.2mg, 58%) under condition (c) with diastereoselectivity(d.r.) > 50:1 estimated by  $^1\text{H}$  NMR.  $^1\text{H}$  NMR (400 MHz,  $\text{CDCl}_3$ )  $\delta$  10.38 (s, 1H), 8.68 (dd,  $J$  = 4.2, 1.3 Hz, 1H), 8.66 (dd,  $J$  = 5.3, 4.0 Hz, 1H), 8.06 (dd,  $J$  = 8.3, 1.3 Hz, 1H), 7.79 (dd,  $J$  = 5.4, 3.1 Hz, 2H), 7.73 – 7.65 (m, 4H), 7.62 (dd,  $J$  = 5.4, 3.1 Hz, 2H), 7.48 – 7.40 (m, 2H), 7.35 (dd,  $J$  = 8.3, 4.2 Hz, 1H), 5.25 (d,  $J$  = 9.4 Hz, 1H), 4.08 (q,  $J$  = 7.1 Hz, 2H), 3.69 – 3.53 (m, 2H), 3.49 – 3.37 (m, 1H), 2.66 (qd,  $J$  = 16.3, 5.8 Hz, 2H), 1.87 – 1.72 (m, 2H), 1.72 – 1.61 (m, 1H), 1.50 – 1.37 (m, 1H), 1.18 (t,  $J$  = 7.1 Hz, 3H);  $^{13}\text{C}$  NMR (101 MHz,  $\text{CDCl}_3$ )  $\delta$  171.83, 168.15, 168.02, 166.14, 148.46, 138.52, 136.15, 134.32, 133.94, 133.80, 131.97, 131.51, 127.81, 127.12, 123.67, 123.08, 122.09, 121.65, 116.92, 60.68, 58.03, 37.81, 35.11, 33.90, 27.70, 25.33, 14.13; HRMS (ESI)  $m/z$ : 641.1998 ( $\text{MNa}^+$ ); calc. for  $\text{C}_{35}\text{H}_{30}\text{N}_4\text{O}_7\text{Na}$ : 641.2007 (calc. for  $\text{C}_{35}\text{H}_{30}\text{N}_4\text{O}_7$ : 618.2114).

**(3S,4S)-Eethyl4-(1,3-dioxoisindolin-2-yl)-3-isopropyl-5-oxo-5-(quinolin-8-ylamino)pentanoate (5h)**

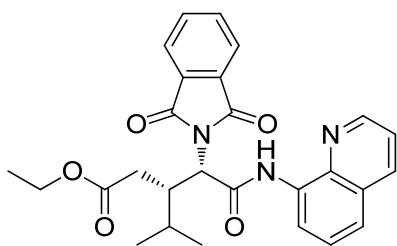

The compound **5h** was prepared according to the **GP-3** under condition (a), (c), (d) and purified by column chromatography in petroleumether: dichloromethane: ethyl acetate = 5:4:1. **5h** was obtained as colorless oil (41.2 mg, 44%) under condition (a); (50.8mg, 54%) under condition (c); (72.7mg, 77%) under condition (c) with diastereoselectivity(d.r.) > 50:1 estimated by  $^1\text{H}$  NMR.  $^1\text{H}$  NMR (400 MHz,  $\text{CDCl}_3$ )  $\delta$  10.58 (s, 1H), 8.80 (dd,  $J$  = 4.2, 1.7 Hz, 1H), 8.72 (dd,  $J$  = 5.1, 3.9 Hz, 1H), 8.10 (dd,  $J$  = 8.3, 1.7 Hz, 1H), 7.88 (dd,  $J$  = 5.5, 3.1 Hz, 2H), 7.72 (dd,  $J$  = 5.5, 3.0 Hz, 2H), 7.51 – 7.44 (m, 2H), 7.40 (dd,  $J$  = 8.3, 4.2 Hz, 1H), 5.19 (d,  $J$  = 10.9 Hz, 1H), 3.95 (qq,  $J$  = 10.8, 7.1 Hz, 2H), 3.63 – 3.41 (m, 1H),

2.58 (dd,  $J = 5.6, 1.0$  Hz, 2H), 1.92 – 1.78 (m, 1H), 1.10 (t,  $J = 7.1$  Hz, 3H), 1.02 (d,  $J = 6.9$  Hz, 3H), 0.83 (d,  $J = 6.9$  Hz, 3H);  $^{13}\text{C}$  NMR (101 MHz,  $\text{CDCl}_3$ )  $\delta$  172.81, 168.13, 166.86, 148.55, 138.74, 136.18, 134.43, 134.36, 131.69, 127.92, 127.22, 123.80, 122.11, 121.70, 117.10, 60.67, 58.55, 38.70, 32.33, 28.25, 20.95, 16.66, 14.02; HRMS (EI)  $m/z$ : 473.1939 ( $\text{M}^+$ ); calc. for  $\text{C}_{27}\text{H}_{27}\text{N}_3\text{O}_5$ : 473.1951.

**(3*S*,4*S*)-Ethyl3-cyclohexyl-4-(1,3-dioxisoindolin-2-yl)-5-oxo-5-(quinolin-8-ylamino)pentanoate (5i)**

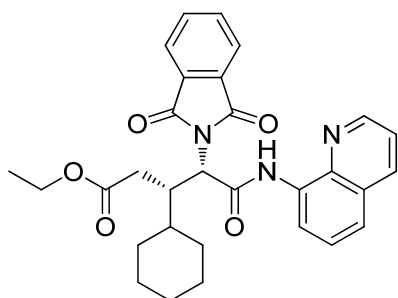

The compound **5i** was prepared according to the **GP-3** under condition (a), (c), (d) and purified by column chromatography in petroleumether: dichloromethane: ethyl acetate = 5:4:1. **5i** was obtained as colorless oil (45.1 mg, 44%) under condition (a); (54.4 mg, 54%) under condition (c); (74.7mg, 74%) under condition (c) with diastereoselectivity(d.r.) > 50:1 estimated by  $^1\text{H}$  NMR.  $^1\text{H}$  NMR (400 MHz,  $\text{CDCl}_3$ )  $\delta$  10.52 (s, 1H), 8.78 (dd,  $J = 4.2, 1.7$  Hz, 1H), 8.71 (dd,  $J = 8.9, 4.6$  Hz, 1H), 8.10 (dd,  $J = 8.3, 1.7$  Hz, 1H), 7.88 (dd,  $J = 5.5, 3.0$  Hz, 2H), 7.73 (dd,  $J = 5.5, 3.1$  Hz, 2H), 7.49 – 7.44 (m, 2H), 7.40 (dd,  $J = 8.3, 4.2$  Hz, 1H), 5.26 (d,  $J = 10.0$  Hz, 1H), 4.04 – 3.90 (m, 2H), 3.49 – 3.35 (m, 1H), 2.64 (d,  $J = 5.7$  Hz, 2H), 1.79 – 1.44 (m, 6H), 1.28 – 1.18 (m, 2H), 1.11 (t,  $J = 7.1$  Hz, 3H), 1.09 – 0.93 (m, 3H);  $^{13}\text{C}$  NMR (101 MHz,  $\text{CDCl}_3$ )  $\delta$  172.91, 168.16, 166.86, 148.51, 138.74, 136.20, 134.42, 134.33, 131.70, 127.94, 127.26, 123.81, 122.09, 121.70, 117.08, 60.63, 57.78, 39.45, 39.03, 33.43, 31.32, 27.83, 26.87, 26.68, 26.46, 14.06; HRMS (EI)  $m/z$ : 513.2261 ( $\text{M}^+$ ); calc. for  $\text{C}_{30}\text{H}_{31}\text{N}_3\text{O}_5$ : 513.2264.

**(4*R*,5*S*)-Ethyl5-(1,3-dioxisoindolin-2-yl)-4-methyl-6-oxo-6-(quinolin-8-ylamino)hexanoate (5j)**

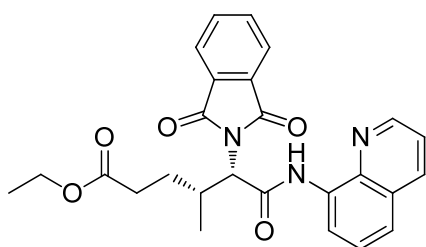

The compound **5j** was prepared according to the **GP-3** under condition (c) and purified by column chromatography in petroleumether: dichloromethane: ethyl acetate = 5:4:1. **5j** was obtained as colorless oil (37.4 mg, 41%) under condition (c) with diastereoselectivity(d.r.) = 17:1 estimated by  $^1\text{H}$  NMR.  $^1\text{H}$  NMR (400 MHz,  $\text{CDCl}_3$ )  $\delta$  10.50 (s, 1H), 8.78 (dd,  $J = 4.2, 1.2$  Hz, 1H), 8.75 – 8.71 (m, 1H), 8.11 (dd,  $J = 8.3, 1.1$  Hz, 1H), 7.87 (dd,  $J = 5.3, 3.1$  Hz, 2H), 7.72 (dd,  $J = 5.4, 3.0$  Hz, 2H), 7.50 – 7.48 (m, 2H), 7.41 (dd,  $J = 8.3, 4.3$  Hz, 1H), 4.83 (d,  $J = 10.2$  Hz, 1H), 4.09 – 4.03 (m, 2H), 3.08 (dtd,  $J = 13.5, 6.7,$

3.6 Hz, 1H), 2.57 – 2.41 (m, 2H), 2.13 – 2.03 (m, 1H), 1.72 – 1.60 (m, 1H), 1.18 (t,  $J = 7.1$  Hz, 3H), 0.99 (d,  $J = 6.7$  Hz, 3H);  $^{13}\text{C}$  NMR (101 MHz,  $\text{CDCl}_3$ )  $\delta$  173.29, 168.16, 166.43, 148.58, 138.74, 136.28, 134.45, 134.22, 131.64, 127.97, 127.31, 123.81, 123.74, 122.15, 121.73, 117.12, 61.11, 60.49, 32.05, 31.93, 29.37, 16.08, 14.24; HRMS (EI)  $m/z$ : 459.1798 ( $\text{M}^+$ ); calc. for  $\text{C}_{26}\text{H}_{25}\text{N}_3\text{O}_5$ : 459.1794.

**(R)-Ethyl3-((S)-1-(1,3-dioxisoindolin-2-yl)-2-oxo-2-(quinolin-8-ylamino)ethyl)henicosanoate (7a)**

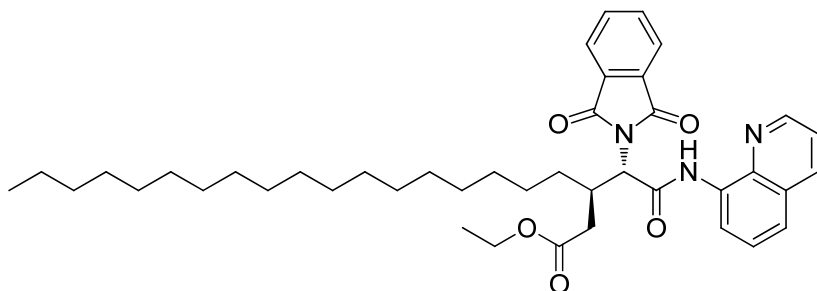

The compound **7a** was prepared according to the **GP-3** under condition **(a)** and purified by column chromatography in petroleum ether: dichloromethane: ethyl acetate = 7:2:1. **5i** was obtained as white solid (113.5 mg, 83%) under condition **(a)** with diastereoselectivity(d.r.) > 50:1 estimated by  $^1\text{H}$  NMR.  $^1\text{H}$  NMR (400 MHz,  $\text{CDCl}_3$ )  $\delta$  10.45 (s, 1H), 8.75 – 8.71 (m, 2H), 8.10 (dd,  $J = 8.3, 1.5$  Hz, 1H), 7.87 (dd,  $J = 5.5, 3.0$  Hz, 2H), 7.72 (dd,  $J = 5.6, 3.1$  Hz, 2H), 7.47 (d,  $J = 4.2$  Hz, 2H), 7.39 (ddd,  $J = 8.3, 4.2, 0.9$  Hz, 1H), 5.30 (d,  $J = 9.5$  Hz, 1H), 4.14 (q,  $J = 7.0$  Hz, 2H), 3.47 – 3.37 (m, 1H), 2.67 (qd,  $J = 16.2, 5.8$  Hz, 2H), 1.63 – 1.53 (m, 1H), 1.29 – 1.13 (m, 36H), 0.86 (t,  $J = 6.8$  Hz, 3H);  $^{13}\text{C}$  NMR (101 MHz,  $\text{CDCl}_3$ )  $\delta$  172.18, 168.17, 166.54, 148.45, 138.67, 136.22, 134.35, 134.17, 131.72, 127.92, 127.26, 123.72, 122.09, 121.68, 117.03, 60.64, 58.51, 35.39, 34.34, 31.99, 30.57, 29.77, 29.73, 29.71, 29.68, 29.57, 29.52, 29.43, 26.26, 22.76, 14.25, 14.19; HRMS (ESI)  $m/z$ : 706.4048 ( $\text{MNa}^+$ ); calc. for  $\text{C}_{42}\text{H}_{57}\text{N}_3\text{O}_5\text{Na}$ : 706.4190 (calc. for  $\text{C}_{42}\text{H}_{57}\text{N}_3\text{O}_5$ : 683.4298).

### General Procedure (GP-4) for Arylation of Secondary C(Sp<sup>3</sup>)-H

To a 30-mL resealable Schlenk flask was added **3f** (0.2 mmol, overall concentration = 0.133 mol/L), Pd(OAc)<sub>2</sub> (4.5 mg, 0.02 mmol), aryl iodo (0.3 mmol), AgOAc (0.30 mmol), *t*-BuOH (1.5 mL). The flask was then charged with N<sub>2</sub>. The mixture was stirred at 90°C for 4 hours under N<sub>2</sub>. After cooling to room temperature, the reaction was diluted with dichloromethane (5 mL) and then filtered through a pad of Celite and washed by dichloromethane (30 mL). Evaporation of organic solvent and purification by column chromatography gave the corresponding products.

#### (2*S*,3*S*)-2-(1,3-Dioxoisindolin-2-yl)-*N*-(quinolin-8-yl)-3-(thiophen-2-yl)henicosanamide (**7b**)

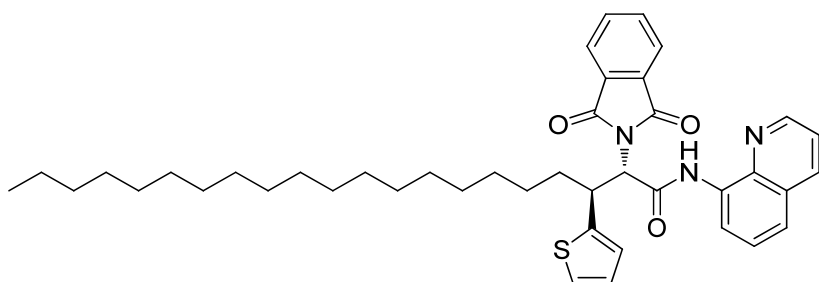

The compound **7b** was prepared according to the **GP-4** and purified by column chromatography in petroleum ether: dichloromethane: ethyl acetate = 7:2:1. **7b** was obtained as a colorless oil (109.2 mg, 80%) with diastereoselectivity (d.r.) = 5:1 estimated by <sup>1</sup>H NMR. <sup>1</sup>H NMR (400 MHz, CDCl<sub>3</sub>) δ 10.08 (s, 1H), 8.72 (dd, *J* = 4.2, 1.6 Hz, 1H), 8.61 (dd, *J* = 6.5, 2.6 Hz, 1H), 8.05 (dd, *J* = 8.2, 1.0 Hz, 1H), 7.90 (dd, *J* = 5.5, 3.0 Hz, 2H), 7.75 – 7.71 (m, 2H), 7.42 – 7.35 (m, 3H), 7.17 (d, *J* = 5.1 Hz, 1H), 7.12 (dd, *J* = 3.4, 0.8 Hz, 1H), 6.88 (dd, *J* = 5.1, 3.5 Hz, 1H), 5.26 (d, *J* = 11.2 Hz, 1H), 4.59 (td, *J* = 11.1, 3.2 Hz, 1H), 1.77 – 1.53 (m, 2H), 1.35 – 1.10 (m, 32H), 0.87 (t, *J* = 6.9 Hz, 3H); <sup>13</sup>C NMR (101 MHz, CDCl<sub>3</sub>) δ 168.26, 165.93, 148.15, 144.04, 138.56, 136.06, 134.15, 131.82, 127.79, 127.21, 127.07, 126.80, 124.62, 123.80, 121.91, 121.58, 116.90, 61.93, 39.88, 34.58, 32.01, 29.79, 29.75, 29.57, 29.45, 29.34, 26.64, 22.78, 14.22; HRMS (ESI) *m/z*: 702.3589 (MNa<sup>+</sup>); calc. for C<sub>42</sub>H<sub>53</sub>N<sub>3</sub>O<sub>3</sub>S Na: 702.3700 (calc. for C<sub>42</sub>H<sub>53</sub>N<sub>3</sub>O<sub>3</sub>S: 679.3808).

#### (2*S*,3*R*)-2-(1,3-Dioxoisindolin-2-yl)-3-(4-methoxyphenyl)-*N*-(quinolin-8-yl)henicosanamide (**7c**)

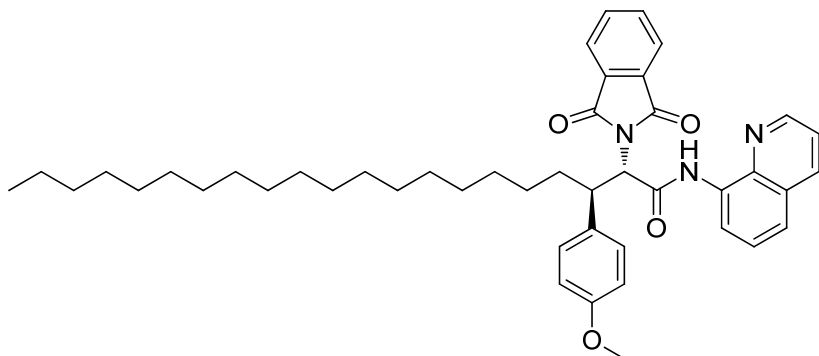

The compound **7c** was prepared according to the **GP-4** and purified by column chromatography in petroleum ether: dichloromethane: ethyl acetate = 7:2:1. **7c** was obtained as white solid (111.1 mg, 79%) with diastereoselectivity(d.r.) > 20:1 estimated by <sup>1</sup>H NMR. <sup>1</sup>H NMR (400 MHz, CDCl<sub>3</sub>) δ 9.92 (s, 1H), 8.68 (dd, *J* = 4.2, 1.6 Hz, 1H), 8.57 (dd, *J* = 6.7, 2.3 Hz, 1H), 8.07 – 8.01 (m, 1H), 7.91 (dd, *J* = 5.4, 3.0 Hz, 2H), 7.73 (dd, *J* = 5.3, 3.1 Hz, 2H), 7.41 – 7.34 (m, 5H), 6.84 (d, *J* = 8.7 Hz, 2H), 5.29 (d, *J* = 11.7 Hz, 1H), 4.14 (td, *J* = 11.0, 4.5 Hz, 1H), 3.68 (s, 3H), 1.66 – 1.56 (m, 2H), 1.31 – 1.05 (m, 32H), 0.87 (t, *J* = 6.9 Hz, 3H); <sup>13</sup>C NMR (101 MHz, CDCl<sub>3</sub>) δ 168.48, 166.30, 158.84, 148.01, 138.53, 136.01, 134.30, 134.21, 132.49, 131.90, 129.69, 127.77, 127.20, 123.75, 121.79, 121.52, 116.85, 114.56, 61.51, 55.13, 43.45, 33.43, 32.01, 29.79, 29.76, 29.71, 29.67, 29.59, 29.53, 29.48, 29.45, 26.70, 22.78, 14.22; HRMS (ESI) *m/z*: 726.3998 (MNa<sup>+</sup>); calc. for C<sub>45</sub>H<sub>57</sub>N<sub>3</sub>O<sub>4</sub>Na: 726.4241 (calc. for C<sub>45</sub>H<sub>57</sub>N<sub>3</sub>O<sub>4</sub>: 703.4349).

**(2*S*,3*R*)-3-(4-Acetylphenyl)-2-(1,3-dioxisoindolin-2-yl)-*N*-(quinolin-8-yl)henicosanamide (7d)**

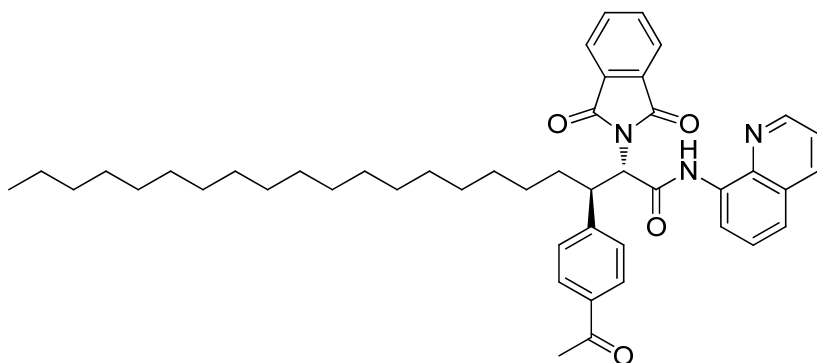

The compound **7d** was prepared according to the **GP-4** and purified by column chromatography in petroleum ether: dichloromethane: ethyl acetate = 6:3:1. **7d** was obtained as a white solid (110.2 mg, 77%) with diastereoselectivity(d.r.) > 20:1 estimated by <sup>1</sup>H NMR. <sup>1</sup>H NMR (400 MHz, CDCl<sub>3</sub>) δ 9.90 (s, 1H), 8.64 (dd, *J* = 4.2, 1.6 Hz, 1H), 8.51 (dd, *J* = 7.2, 1.7 Hz, 1H), 8.05 (dd, *J* = 8.3, 1.6 Hz, 1H), 7.93 (dd, *J* = 5.5, 3.0 Hz, 2H), 7.89 (d, *J* = 8.3 Hz, 2H), 7.76 (dd, *J* = 5.5, 3.0 Hz, 2H), 7.57 (d, *J* = 8.3 Hz, 2H), 7.41 – 7.34 (m, 3H), 5.32 (d, *J* = 11.6 Hz, 1H), 4.34 – 4.26 (m, 1H), 2.47 (s, 3H), 1.71 – 1.62 (m, 2H), 1.29 – 1.07 (m, 32H), 0.87 (t, *J* = 6.8 Hz, 3H); <sup>13</sup>C NMR (101 MHz, CDCl<sub>3</sub>) δ 197.73, 168.28, 165.71, 148.14, 146.57, 138.39, 136.22, 136.11, 134.46, 133.87, 131.73, 129.15, 128.96, 127.75, 127.16, 123.85, 121.98, 121.61, 116.83, 61.02, 44.19, 32.90, 31.99, 29.76, 29.74, 29.72, 29.67, 29.62, 29.53, 29.42, 26.68, 26.56, 22.76, 14.20; HRMS (ESI) *m/z*: 738.4235 (MNa<sup>+</sup>); calc. for C<sub>46</sub>H<sub>57</sub>N<sub>3</sub>O<sub>4</sub>Na: 738.4241 (calc. for C<sub>46</sub>H<sub>57</sub>N<sub>3</sub>O<sub>4</sub>: 715.4349).

**Methyl 4-((2*S*,3*R*)-2-(1,3-dioxisoindolin-2-yl)-1-oxo-1-(quinolin-8-ylamino)henicosan-3-yl)benzoate (7e)**

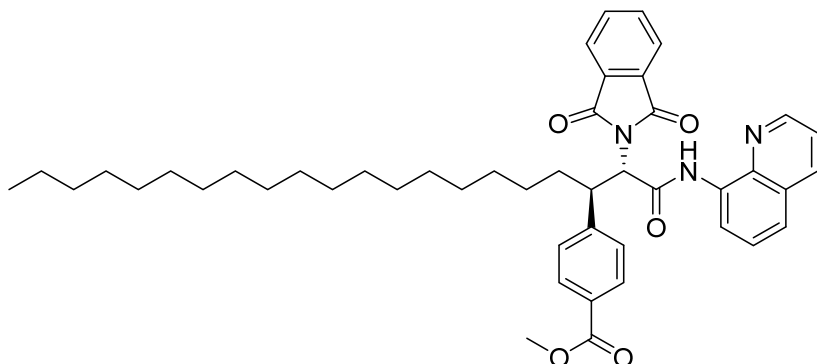

The compound **7e** was prepared according to the **GP-4** and purified by column chromatography in petroleum ether: dichloromethane: ethyl acetate = 7:3:1. **7e** was obtained as a white solid (113.3 mg, 77%) with diastereoselectivity(d.r.) > 20:1 estimated by  $^1\text{H}$  NMR.  $^1\text{H}$  NMR (400 MHz,  $\text{CDCl}_3$ )  $\delta$  9.88 (s, 1H), 8.65 (dd,  $J = 4.2, 1.6$  Hz, 1H), 8.51 (dd,  $J = 7.2, 1.7$  Hz, 1H), 8.05 (dd,  $J = 8.3, 1.6$  Hz, 1H), 7.98 (d,  $J = 8.3$  Hz, 2H), 7.93 (dd,  $J = 5.5, 3.0$  Hz, 2H), 7.76 (dd,  $J = 5.5, 3.0$  Hz, 2H), 7.55 (d,  $J = 8.3$  Hz, 2H), 7.41 – 7.34 (m, 3H), 5.33 (d,  $J = 11.6$  Hz, 1H), 4.33 – 4.24 (m, 1H), 3.85 (s, 3H), 1.71 – 1.61 (m,  $J = 14.4, 6.4$  Hz, 2H), 1.25 – 1.08 (m, 32H), 0.87 (t,  $J = 6.8$  Hz, 3H);  $^{13}\text{C}$  NMR (101 MHz,  $\text{CDCl}_3$ )  $\delta$  168.29, 166.91, 165.69, 148.12, 146.30, 138.41, 136.08, 134.43, 133.89, 131.76, 130.39, 129.23, 128.79, 127.75, 127.14, 123.83, 121.96, 121.55, 116.83, 61.00, 52.04, 44.23, 33.01, 31.99, 29.76, 29.73, 29.72, 29.66, 29.61, 29.51, 29.43, 29.39, 26.65, 22.76, 14.20; HRMS (ESI)  $m/z$ : 754.4198 ( $\text{MNa}^+$ ); calc. for  $\text{C}_{46}\text{H}_{57}\text{N}_3\text{O}_5\text{Na}$ : 754.4190 (calc. for  $\text{C}_{46}\text{H}_{57}\text{N}_3\text{O}_5$ : 731.4298).

### Cleavage of the 8-Aminoquinoline Group

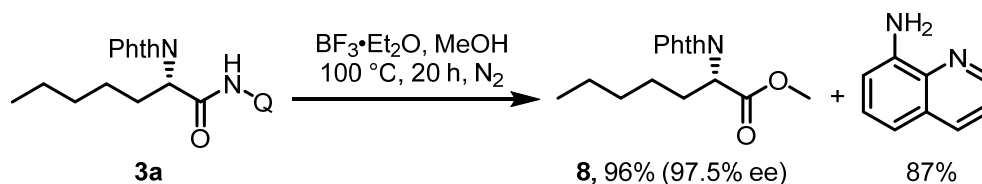

### (S)-Methyl 2-(1,3-dioxisoindolin-2-yl)heptanoate (**8**)

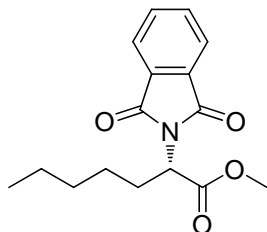

To a 30-mL resealable Schlenk flask was added 8-aminoquinoline amide (**3a**) (60.2 mg, 0.15 mmol, overall concentration = 0.1 mol/L), dry methanol (1.5 mL),  $\text{BF}_3 \cdot \text{Et}_2\text{O}$  (114  $\mu\text{L}$ , 0.9 mmol). The flask was then charged with  $\text{N}_2$ . The mixture was stirred at  $100^\circ\text{C}$  for 20 hours under  $\text{N}_2$ . After cooling to room temperature, the reaction was diluted with dichloromethane (5 mL) and then quenched by  $\text{Et}_3\text{N}$  (0.21 mL, 1.50 mmol). Evaporation of organic solvent and purification by column chromatography in petroleum ether: ethyl acetate = 4:1 gave the corresponding products **8** (41.8mg, 96%) as a colorless oil and 8-aminoquinoline (18.8mg, 87%). The compound **8** is known.<sup>3</sup>  $^1\text{H}$  NMR (400 MHz,  $\text{CDCl}_3$ )  $\delta$  7.87 (dd,  $J = 5.5, 3.1$  Hz, 2H), 7.74 (dd,  $J = 5.5, 3.1$  Hz, 2H), 4.84 (dd,  $J = 10.5, 5.3$  Hz, 1H), 3.72 (s, 3H), 2.32 – 2.15 (m, 2H), 1.37 – 1.22 (m, 6H), 0.84 (t,  $J = 7.0$  Hz, 3H);  $^{13}\text{C}$  NMR (101 MHz,  $\text{CDCl}_3$ )  $\delta$  170.12, 167.85, 134.29, 131.99, 123.67, 52.79, 52.35, 31.19, 28.76, 26.10, 22.50, 14.05. HPLC Chiralpack<sup>®</sup> OJ-H column followed by OJ-H column (*n*-hexane/isopropanol = 92:8, 0.40mL/min)  $t_r = 34.301$  min (major),  $t_r = 36.187$  (minor), 97.5% ee.

### Chiral HPLC Data

#### HPLC Conditions:

Chiral stationary phase: Chiralpack<sup>®</sup> OJ-H column followed by OJ-H column, *n*-hexane/isopropanol = 92:8, 0.40mL/min

Signal: VWD1 A, Wavelength = 220 nm

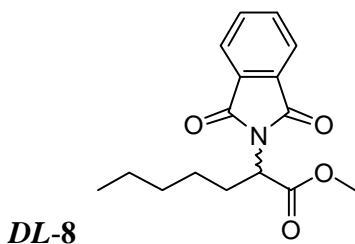



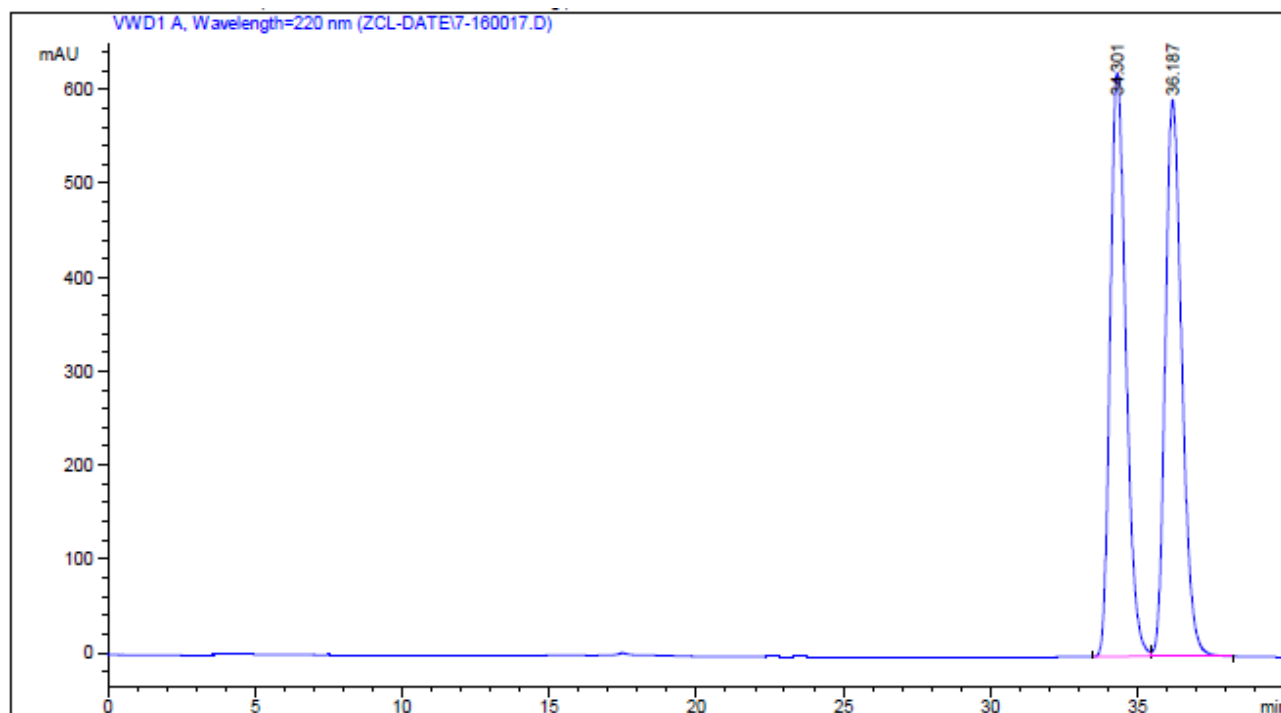

**Area% report for DL-8:**

| Retention Time (min) | Area (mAU*s) | Area %   | Height (mAU) | Height % |
|----------------------|--------------|----------|--------------|----------|
| 34.301               | 2.31798e4    | 49.9240  | 622.19818    | 51.1983  |
| 36.187               | 2.32504e4    | 50.0760  | 593.07214    | 48.8017  |
| Totals               | 4.64302e4    | 100.0000 | 1215.27032   | 100.0000 |

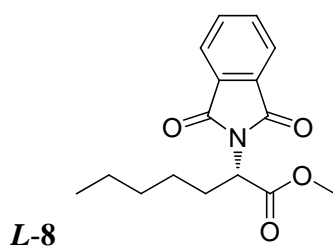

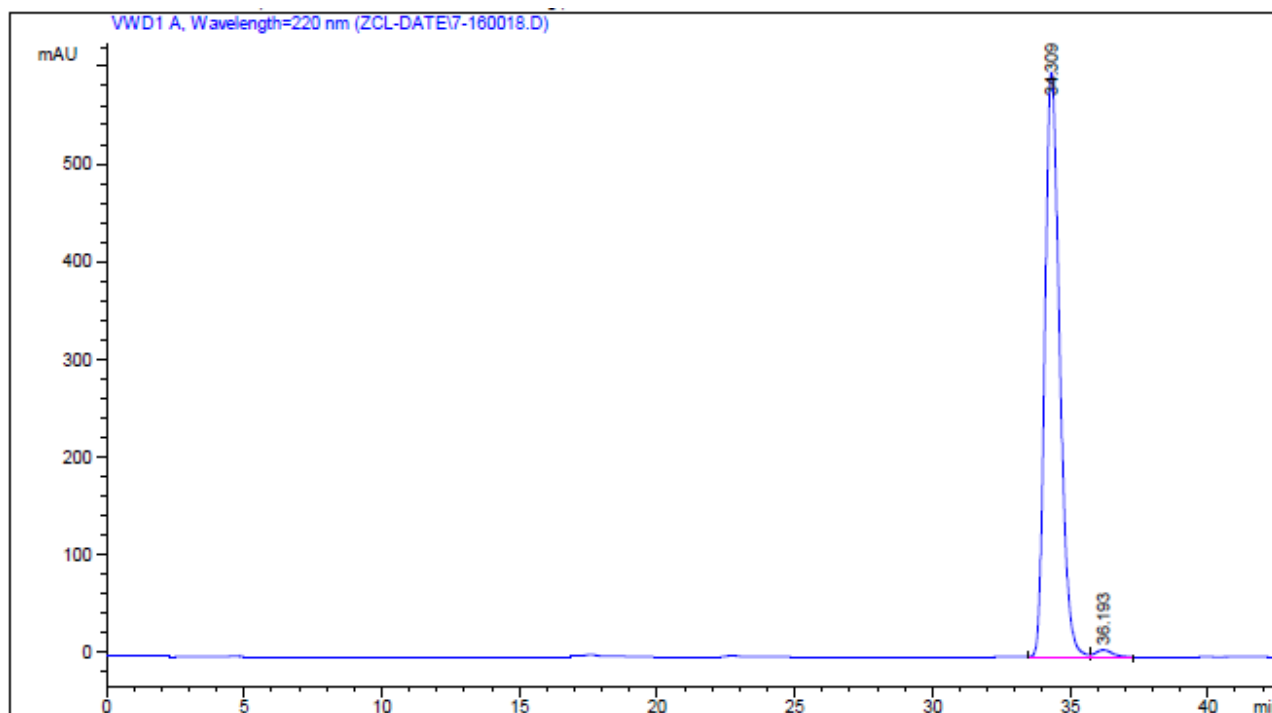

**Area% report for L-8:**

| Retention Time (min) | Area (mAU*s) | Area %   | Height (mAU) | Height % |
|----------------------|--------------|----------|--------------|----------|
| 34.309               | 2.22416e4    | 98.7216  | 598.46210    | 98.8347  |
| 36.193               | 288.02582    | 1.2784   | 7.05596      | 1.1653   |
| Totals               | 2.25296e4    | 100.0000 | 605.51806    | 100.0000 |

## Synthesis of Palladacycle Compound

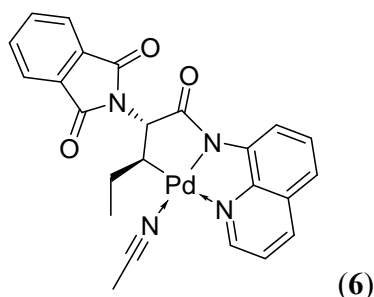

Pd(OAc)<sub>2</sub> (224.5 mg, 1.0 mmol) and **1b** (373.4 mg, 1.0 mmol) were added to CH<sub>3</sub>CN/DCE (4 mL + 2 mL). The reaction was stirred at 50°C for 5h, and then the solvent was removed in vacuum. To the crude product, dichloromethane (3 mL) was added, followed by petroleum ether (10 mL), and then the purified product was collected by vacuum filtration, washed with petroleum ether: dichloromethane = 10:1, and dried under vacuum to afford **6** mixed with an unknown complex **6'** as a yellow powder (510.0 mg in total, estimated ratio of **6** to **6'** as 5.9:1 and estimated yield 80% of **6** based on crude <sup>1</sup>H NMR). Pure complex **6** was obtained from saturated solution in dimethyl sulfoxide. <sup>1</sup>H NMR (400 MHz, DMSO-*d*<sub>6</sub>) δ 9.17 (d, *J* = 4.2 Hz, 1H), 8.81 (dd, *J* = 5.4, 3.5 Hz, 1H), 8.59 (d, *J* = 8.2 Hz, 1H), 7.96 – 7.83 (m, 4H), 7.72 (dd, *J* = 8.2, 4.9 Hz, 1H), 7.60 – 7.50 (m, 2H), 4.90 (d, *J* = 7.6 Hz, 1H), 2.79 (t, *J* = 6.3 Hz, 1H), 2.08 (s, 3H), 1.67 – 1.54 (m, 1H), 1.28 – 1.05 (m, 4H).

### X-ray crystal data of 6:

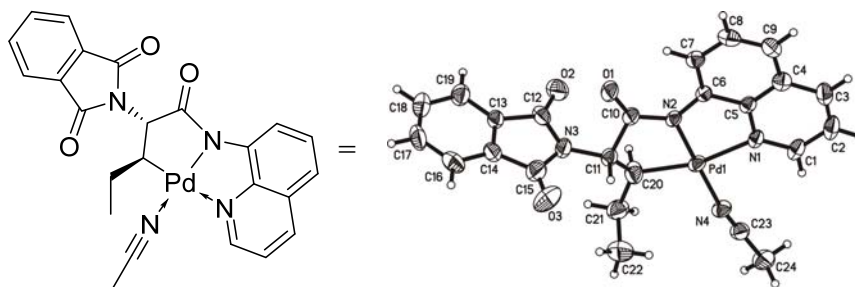

|                |                |                   |
|----------------|----------------|-------------------|
| Bond precision | C-C = 0.0094 Å |                   |
| Wavelength     | 0.71073        |                   |
| Cell           | a = 9.1886(7)  | alpha = 81.563(6) |
|                | b = 10.6165(7) | beta = 81.840(6)  |
|                | c = 11.5601(9) | gamma = 72.521(7) |
| Temperature    | 293 K          |                   |
|                | Calculated     | Reported          |
| Volume         | 1058.25(14)    | 1058.25(13)       |
| Space group    | P -1           | P -1              |

|                                |                  |                                  |
|--------------------------------|------------------|----------------------------------|
| Hall group                     | -P 1             | -P 1                             |
| Moiety formula                 | C24 H20 N4 O3 Pd | C24 H20 N4 O3 Pd                 |
| Sum formula                    | C24 H20 N4 O3 Pd | C24 H20 N4 O3 Pd                 |
| Mr                             | 518.84           | 518.84                           |
| Dx, g cm <sup>-3</sup>         | 1.628            | 1.628                            |
| Z                              | 2                | 2                                |
| Mu (mm <sup>-1</sup> )         | 0.912            | 0.912                            |
| F000                           | 524.0            | 524.0                            |
| F000'                          | 522.19           |                                  |
| h,k,lmax                       | 11,12,13         | 11,12,13                         |
| Nref                           | 3876             | 3867                             |
| Tmin,Tmax                      | 0.754,0.811      | 0.759,0.818                      |
| Tmin'                          | 0.739            |                                  |
| Correction method = MULTI-SCAN |                  |                                  |
| Data completeness = 0.998      |                  | Theta(max) = 25.350              |
| R(reflections) = 0.0513( 3180) |                  | wR2(reflections) = 0.1085( 3867) |
| S = 1.104                      |                  | Npar = 295                       |

## References

1. Tran, L.D.; Daugulis, O. *Angew.Chem.Int.Ed.*, **2012**, *51*, 5188.
2. Reddy, B.V.S.; Reddy, L.R.; Corey, E.J. *Org.Lett.*, **2006** (8): 3391-3394.
3. Huang, T. S.; Keh, C. C. K.; Li, C. J. *Chem.Commun.*, **2002**, 2440-2441.
